# Supplementary material
Source: publisher figshare collection journal article supplement (https://acs.figshare.com/ndownloader/files/5921751)
Supplement: Supplementary file 1 [file 5921751]

# Supporting Information

## **7-Deaza-2'-deoxyguanosine: Selective Nucleobase Halogenation, Positional Impact of Space-Occupying Substituents and Stability of DNA with Parallel and Antiparallel Strand Orientation**

**Sachin A. Ingale<sup>†</sup> and Frank Seela<sup>\*†‡</sup>**

*<sup>†</sup>Laboratory of Bioorganic Chemistry and Chemical Biology, Center for Nanotechnology, Heisenbergstraße 11, 48149 Münster, Germany and <sup>‡</sup>Laboratorium für Organische und Bioorganische Chemie, Institut für Chemie neuer Materialien, Universität Osnabrück, Barbarastraße 7, 49069 Osnabrück, Germany*

## Table of Contents

|                                                                                                                  |    |
|------------------------------------------------------------------------------------------------------------------|----|
| <b>Table S1.</b> $^{13}\text{C}$ NMR chemical shifts of 7-deazapurine derivatives.....                           | 3  |
| <b>Table S2.</b> $^1\text{H}$ - $^{13}\text{C}$ coupling constants of 7-deaza-2'-deoxyguanosine derivatives..... | 4  |
| <b>Table S3.</b> Selected chemical shifts of 7-deaza-2'-deoxyguanosine derivatives. ....                         | 5  |
| <b>Figure S1.</b> Conformer population of nucleosides <b>1-4</b> .....                                           | 6  |
| <b>Figure S2.</b> UV/vis spectra of nucleosides <b>1-4</b> and nucleobase <b>21</b> .....                        | 6  |
| <b>Figure S3.</b> UV-visible spectrum of nucleoside <b>2</b> in various solvents.....                            | 7  |
| <b>Figure S4.</b> Fluorescence emission spectra of <b>2</b> , ss ODN <b>25</b> , ds ODN <b>25•35</b> .....       | 7  |
| <b>Figure S5.</b> Structures of phosphoramidites.....                                                            | 8  |
| <b>Figures S6-S9.</b> Reversed phase HPLC profiles of purified oligonucleotides.....                             | 8  |
| <b>Figures S10-21.</b> Thermal denaturation curves of oligonucleotide duplexes.....                              | 11 |
| <b>Figure S22.</b> CD spectra of nucleosides <b>2</b> and <b>3</b> .....                                         | 15 |
| <b>Figures S23-S79.</b> NMR spectra of 7-deaza-2'-deoxyguanosine derivatives.....                                | 16 |

**Table S1. <sup>13</sup>C NMR Chemical Shifts of 7-Deazapurine Derivatives<sup>a</sup>**

|                         | C2 <sup>b</sup><br>C2 <sup>c</sup> | C6 <sup>b</sup><br>C4 <sup>c</sup> | C5 <sup>b</sup><br>C4a <sup>c</sup> | C7 <sup>b</sup><br>C5 <sup>c</sup> | C8 <sup>b</sup><br>C6 <sup>c</sup> | C4 <sup>b</sup><br>C7a <sup>c</sup> | CH/CH <sub>3</sub> /OCH <sub>3</sub> /C=O | Phenyl-C7<br>Phenyl-C5                                                               | C1'  | C2'               | C3'               | C4'  | C5'  |
|-------------------------|------------------------------------|------------------------------------|-------------------------------------|------------------------------------|------------------------------------|-------------------------------------|-------------------------------------------|--------------------------------------------------------------------------------------|------|-------------------|-------------------|------|------|
| <b>1a</b> <sup>19</sup> | 151.9                              | 157.2                              | 103.7                               | 112.9                              | 71.5                               | 151.3                               | -                                         | -                                                                                    | 86.9 | 37.5              | 71.3              | 87.4 | 62.3 |
| <b>6</b>                | 152.0                              | 157.2                              | 103.7                               | 73.1                               | 112.8                              | 151.3                               | -                                         | -                                                                                    | 92.0 | 70.8 <sup>d</sup> | 70.4 <sup>d</sup> | 85.1 | 62.3 |
| <b>2</b>                | 151.8                              | 158.1                              | 100.8                               | 102.2                              | 133.0                              | 151.2                               | -                                         | 132.0, 128.6,<br>128.2, 127.3                                                        | 83.9 | 37.0              | 70.9              | 87.0 | 61.9 |
| <b>10</b>               | 145.8                              | 156.2                              | 104.6                               | 102.9                              | 135.7                              | 148.5                               | 34.4/18.6/-/179.7                         | 131.6, 129.0,<br>128.2, 127.9                                                        | 83.2 | 36.4              | 70.4              | 86.6 | 61.4 |
| <b>11</b>               | 145.9                              | 156.5                              | 105.0                               | 103.0                              | 135.9                              | 148.6                               | 34.6/18.8/54.9/179.8                      | 131.8 <sup>d</sup> , 129.8 <sup>d</sup> ,<br>129.6 <sup>d</sup> , 127.5 <sup>d</sup> | 83.9 | 37.5              | 71.0              | 85.8 | 64.8 |
| <b>8</b> <sup>6a</sup>  | 147.5                              | 156.1                              | 104.0                               | 55.7                               | 124.3                              | 147.1                               | 34.7/18.8/-/180.0                         | -                                                                                    | 82.6 | - <sup>e</sup>    | 70.8              | 87.3 | 61.7 |
| <b>9</b>                | 146.3                              | 154.8                              | 107.6                               | 89.6                               | 74.2                               | 148.9                               | 34.7/18.9/-/180.1                         | -                                                                                    | 87.2 | 37.3              | 70.9              | 87.2 | 62.0 |
| <b>3</b> <sup>22</sup>  | 152.6                              | 158.8                              | 97.2                                | 120.1                              | 115.0                              | 151.9                               | -                                         | 134.3, 127.8,<br>127.6, 125.6                                                        | 82.1 | - <sup>e</sup>    | 71.0              | 87.0 | 62.0 |
| <b>13</b>               | 146.9                              | 156.8                              | 101.0                               | 120.6                              | 117.4                              | 148.7                               | 34.7/18.9/-/180.0                         | 133.6, 128.0,<br>127.8, 126.1                                                        | 82.4 | - <sup>e</sup>    | 70.8              | 87.3 | 61.8 |
| <b>14</b>               | 147.0                              | 156.8                              | 101.2                               | 120.8                              | 117.1                              | 148.8                               | 34.7/18.9/54.9/180.0                      | 133.3 <sup>d</sup> , 127.9 <sup>d</sup> ,<br>127.7 <sup>d</sup> , 126.1 <sup>d</sup> | 82.5 | - <sup>e</sup>    | 70.9              | 85.6 | 64.1 |
| <b>4</b>                | 152.9                              | 159.0                              | 96.8                                | 109.0                              | 114.2                              | 151.5                               | -                                         | 130.0, 128.5,<br>120.3, 120.1                                                        | 82.3 | - <sup>e</sup>    | 71.1              | 87.1 | 62.0 |
| <b>19</b>               | 147.3                              | 157.1                              | 101.0                               | 109.8                              | 116.4                              | 148.4                               | 34.8/18.9/54.9/180.1                      | 130.0 <sup>d</sup> , 128.7 <sup>d</sup> ,<br>120.6 <sup>d</sup> , 120.1 <sup>d</sup> | 82.6 | - <sup>e</sup>    | 70.5              | 85.4 | 64.0 |

<sup>a</sup> Measured in DMSO-*d*<sub>6</sub> at 298 K. <sup>b</sup> Purine numbering. <sup>c</sup> Systematic numbering. <sup>d</sup> Tentative. <sup>e</sup> Superimposed by DMSO.

**Table S2.  $^1\text{H}$ - $^{13}\text{C}$  Coupling Constants (Hz) of 7-Deaza-2'-deoxyguanosine Derivatives<sup>a,b</sup>**

|                                                                            | <i>J</i> [Hz] |       |       |       |       |       |       |       |       |       |
|----------------------------------------------------------------------------|---------------|-------|-------|-------|-------|-------|-------|-------|-------|-------|
|                                                                            | 6             | 9     | 2     | 10    | 11    | 3     | 13    | 14    | 4     | 19    |
| <sup>3</sup> <i>J</i> (C7a, H-C5) or<br><sup>3</sup> <i>J</i> (C7a, H-C1') | 5.4           | 4.5   | 5.9   | 6.6   | 6.6   | -     | -     | -     | -     | -     |
| <sup>3</sup> <i>J</i> (C7a, H-C6) or<br><sup>3</sup> <i>J</i> (C7a, H-C1') | -             | -     | -     | -     | -     | 8.9   | 6.0   | 7.9   | 5.8   | 8.3   |
| <sup>2</sup> <i>J</i> (C4a, H-C5)<br><sup>2</sup> <i>J</i> (C4a, H-N1)     | 3.5           | 3.5   | 3.4   | 3.4   | 3.5   | -     | -     | -     | -     | -     |
| <sup>3</sup> <i>J</i> (C4a, H-C6)<br><sup>2</sup> <i>J</i> (C5, H-C6)      | -             | -     | -     | -     | -     | 6.5   | 5.9   | 7.3   | -     | 6.1   |
| <sup>1</sup> <i>J</i> (C5, H-C5)<br><sup>1</sup> <i>J</i> (C6, H-C6)       | 179.8         | -     | 175.0 | 176.8 | 176.7 | -     | -     | -     | -     | -     |
| <sup>1</sup> <i>J</i> (C1', H-C1')                                         | 157.4         | 160.1 | 159.8 | 160.1 | 164.1 | 163.8 | 164.2 | 167.1 | 166.3 | 164.2 |
| <sup>1</sup> <i>J</i> (C3', H-C3')                                         | 148.6         | 148.7 | 151.5 | 150.1 | 149.2 | 150.8 | 150.3 | 148.3 | 146.3 | 152.6 |
| <sup>1</sup> <i>J</i> (C4', H-C4')                                         | 148.9         | 150.7 | 148.7 | 147.2 | 148.3 | 147.6 | 145.6 | 147.3 | 146.2 | 148.5 |
| <sup>1</sup> <i>J</i> (C5', H-C5')                                         | 137.3         | 139.9 | 140.3 | 140.6 | 142.9 | 139.2 | 139.2 | 141.1 | 140.0 | 143.1 |

<sup>a</sup> Measured in DMSO-*d*<sub>6</sub> at 298 K. <sup>b</sup> Systematic numbering.

**Table S3. Selected Chemical Shifts of 7-Deaza-2'-deoxyguanosine Derivatives.<sup>a,b</sup>**

| Signal | 7-Deaza-dG<br>(1) | 7-Iodo-7-deaza-dG<br>(1b) | 7-Phenyl-7-deaza-dG<br>(3) | 8-Iodo-7-deaza-dG<br>(1a) | 8-Phenyl-7-deaza-dG<br>(2) |
|--------|-------------------|---------------------------|----------------------------|---------------------------|----------------------------|
| C1'    | 82.2              | 81.9                      | 82.1                       | 86.9                      | 83.9                       |
| C2'    | 39.2              | - <sup>c</sup>            | - <sup>c</sup>             | 37.5                      | 37.0                       |
| C3'    | 70.8              | 70.6                      | 71.0                       | 71.3                      | 70.9                       |
| C4'    | 86.9              | 86.8                      | 87.0                       | 87.4                      | 87.0                       |
| C5'    | 61.9              | 61.6                      | 62.0                       | 62.3                      | 61.9                       |
| C7     | 102.1             | 54.7                      | 120.1                      | 112.9                     | 102.2                      |
| C8     | 116.7             | 121.4                     | 115.0                      | 71.5                      | 133.0                      |
| H1'    | 6.30              | 6.24                      | 6.38                       | 6.19                      | 6.08                       |
| H2''   | 2.07              | 2.05                      | 2.10                       | 2.01                      | 1.90                       |
| H2'    | 2.33              | 2.29                      | 2.42                       | 3.14                      | 3.01                       |
| H3'    | 4.29              | 4.24                      | 4.31                       | 4.38                      | 4.21                       |
| H4'    | 3.75              | 3.73                      | 3.77                       | 3.77                      | 3.71                       |
| H5'    | 3.47              | 3.45                      | 3.51                       | 3.60                      | 3.55                       |
| OH3'   | 5.18              | 5.18                      | 5.21                       | 5.22                      | 5.05                       |
| OH5'   | 4.90              | 4.88                      | 4.91                       | 5.04                      | 5.12                       |
| H7     | 6.25              | -                         | -                          | 6.56                      | 6.27                       |
| H8     | 6.90              | 7.09                      | 7.27                       | -                         | -                          |

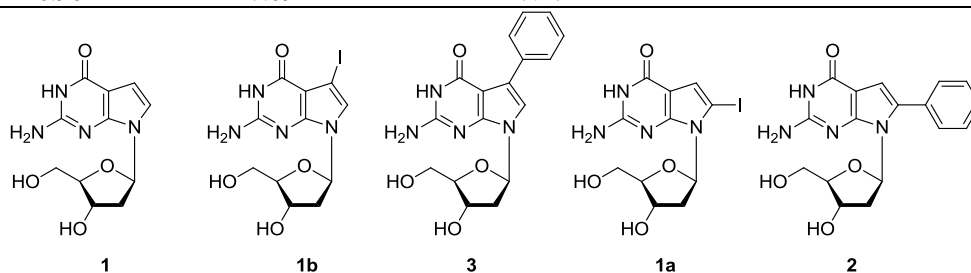

<sup>a</sup> Measured in DMSO-*d*<sub>6</sub> at 298 K. <sup>b</sup> Purine numbering. <sup>c</sup> Superimposed by DMSO-*d*<sub>6</sub>.

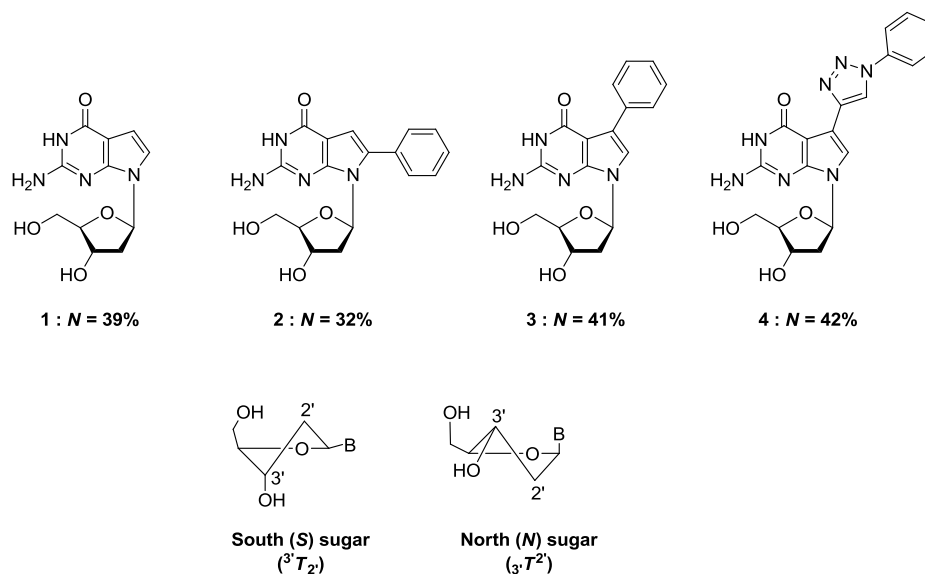

**Figure S1.** Conformer population of nucleosides **1-4** determined in DMSO- $d_6$ . The conformational analysis of the sugar moiety in solution was performed using the program PSEUROT (version 6.3). The input used the following coupling constants:  ${}^3J(\text{H}1', \text{H}2')$ ,  ${}^3J(\text{H}1', \text{H}2'')$ ,  ${}^3J(\text{H}2', \text{H}3')$ ,  ${}^3J(\text{H}2'', \text{H}3')$ ,  ${}^3J(\text{H}3', \text{H}4')$ . B = base.

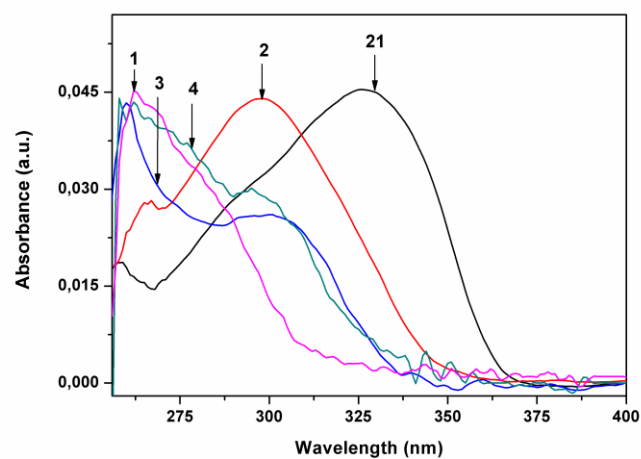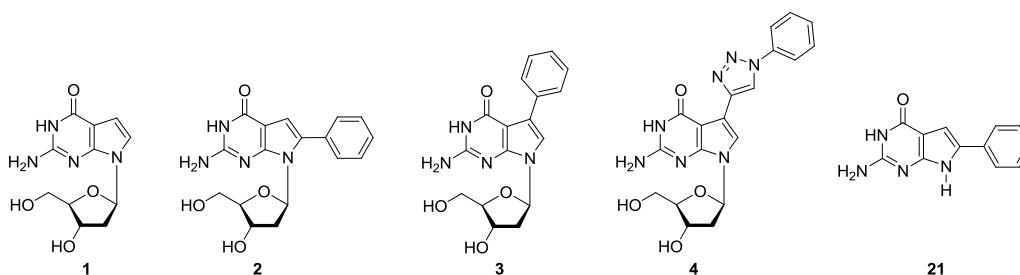

**Figure S2.** UV/vis spectrum of nucleosides **1-4** and nucleobase **21** (2  $\mu\text{M}$ ) in DMSO.

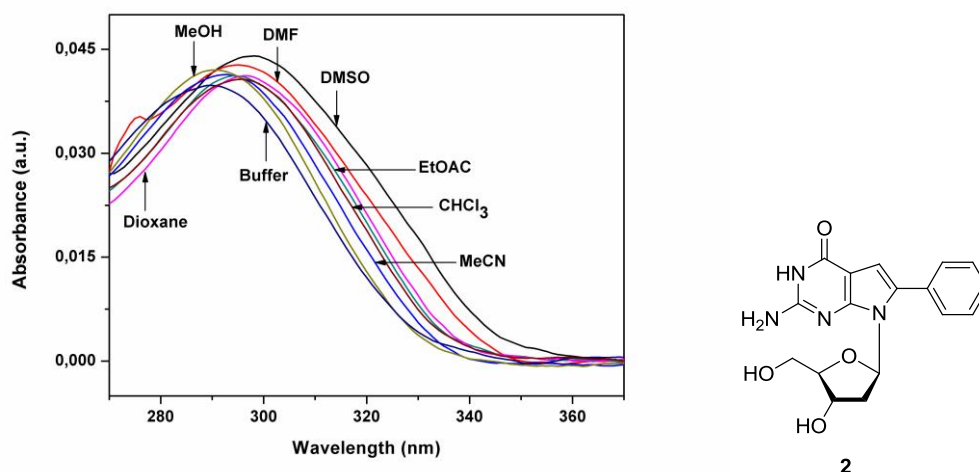

**Figure S3.** UV-Visible spectrum of nucleoside **2** (2  $\mu$ M) in various solvents.

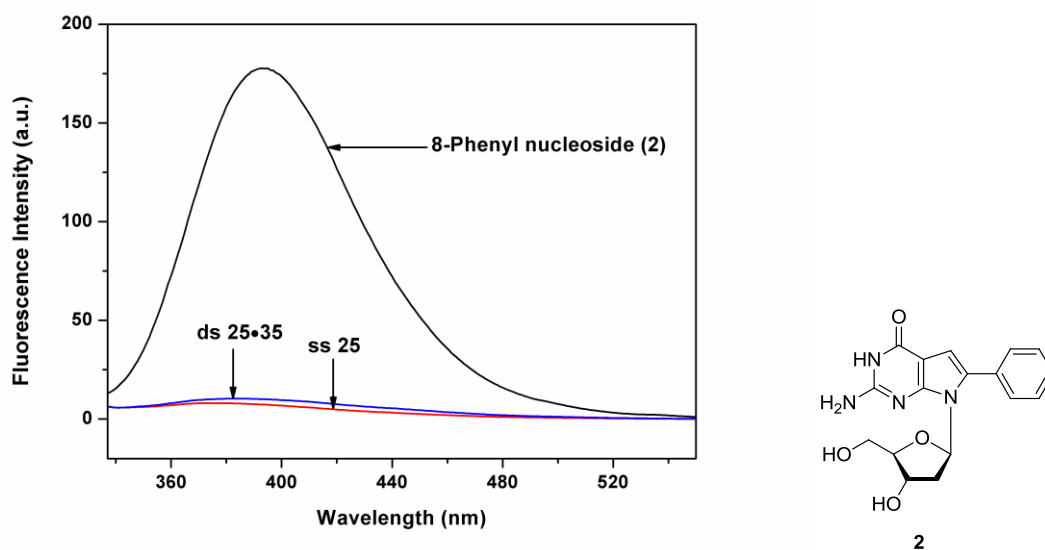

5'-d(TA**2** GTC AAT ACT) (**25**)

5'-d(TA**2** GTC AAT ACT) (**25**)

3'-d(ATC CAG TTA TGA) (**35**)

**Figure S4.** Fluorescence emission spectra of 2  $\mu$ M of 8-phenyl nucleoside **2**, 2  $\mu$ M single stranded (ss) oligonucleotide (**25**) and corresponding double stranded (ds) oligonucleotide (**25•35**, 2  $\mu$ M of each strand) measured in 1 M NaCl, 100 mM MgCl<sub>2</sub>, and 60 mM Na-cacodylate buffer (pH 7.0).

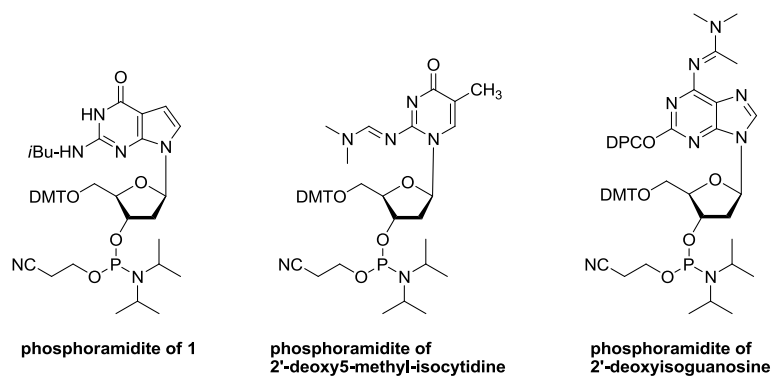

**Figure S5.** Structures of phosphoramidites.

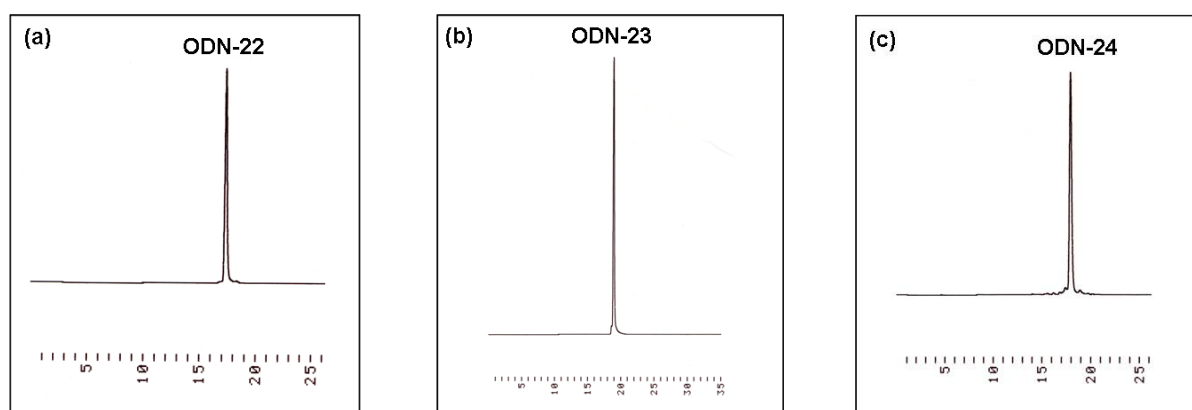

**Figure S6.** Reversed-phase HPLC profiles of purified single-stranded oligonucleotides containing 7-deaza-2'-deoxyguanosine determined at 260 nm, (a) ODN-22; (b) ODN-23; (c) ODN-24. For elution the following solvent system was used: (A) MeCN and (B) 0.1 M (Et<sub>3</sub>NH)OAc (pH 7.0): MeCN (95:5). Gradient II: 0-20 min 0-20% A in B, 20-25 min 20% A in B, flow rate 0.8 mL/min. X-axis corresponds to retention time [min] and y-axis corresponds to UV absorbance at 260 nm.



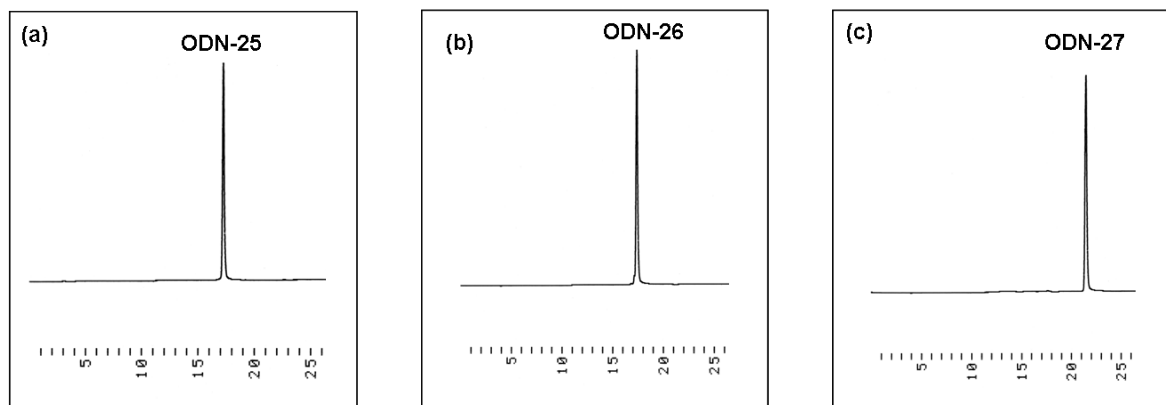

**Figure S7.** Reversed-phase HPLC profiles of purified single-stranded oligonucleotides containing 8-phenyl-7-deaza-2'-deoxyguanosine determined at 260 nm, (a) ODN-25; (b) ODN-26; (c) ODN-27. For elution the following solvent system was used: (A) MeCN and (B) 0.1 M (Et<sub>3</sub>NH)OAc (pH 7.0): MeCN (95:5). Gradient II: 0-20 min 0-20% A in B, 20-25 min 20% A in B, flow rate 0.8 mL/min. X-axis corresponds to retention time [min] and y-axis corresponds to UV absorbance at 260 nm.

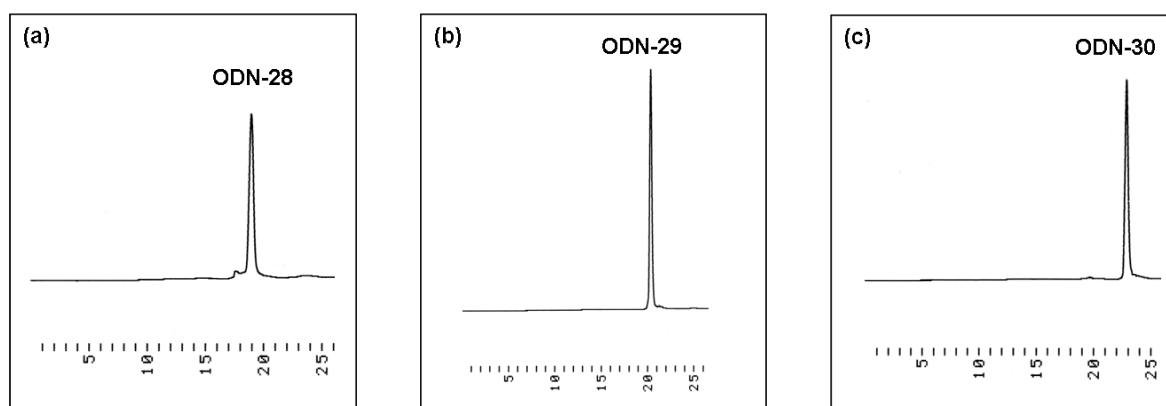

**Figure S8.** Reversed-phase HPLC profiles of purified single-stranded oligonucleotides containing 7-phenyl-7-deaza-2'-deoxyguanosine determined at 260 nm, (a) ODN-28; (b) ODN-29; (c) ODN-30. For elution the following solvent system was used: (A) MeCN and (B) 0.1 M (Et<sub>3</sub>NH)OAc (pH 7.0): MeCN (95:5). Gradient II: 0-20 min 0-20% A in B, 20-25 min 20% A in B, flow rate 0.8 mL/min. X-axis corresponds to retention time [min] and y-axis corresponds to UV absorbance at 260 nm.

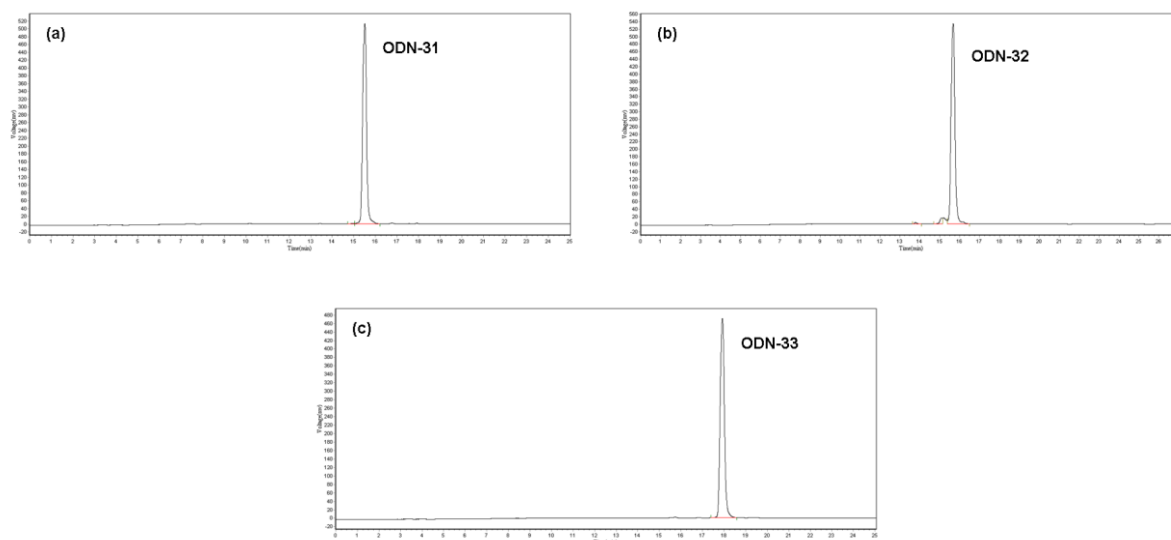

**Figure S9.** Reversed-phase HPLC profiles of purified single-stranded oligonucleotides containing 7-phenyltriazolyl-7-deaza-2'-deoxyguanosine determined at 260 nm, (a) ODN-**31**; (b) ODN-**32**; (c) ODN-**33**. For elution the following solvent system was used: (A) MeCN and (B) 0.1 M (Et<sub>3</sub>NH)OAc (pH 7.0): MeCN (95:5). Gradient II: 0-20 min 0-20% A in B, 20-25 min 20% A in B, flow rate 0.8 mL/min. X-axis corresponds to retention time [min] and y-axis corresponds to UV absorbance at 260 nm, measured in mV.

### Antiparallel Duplexes Containing 7-Deaza-2'-deoxyguanosine (1)

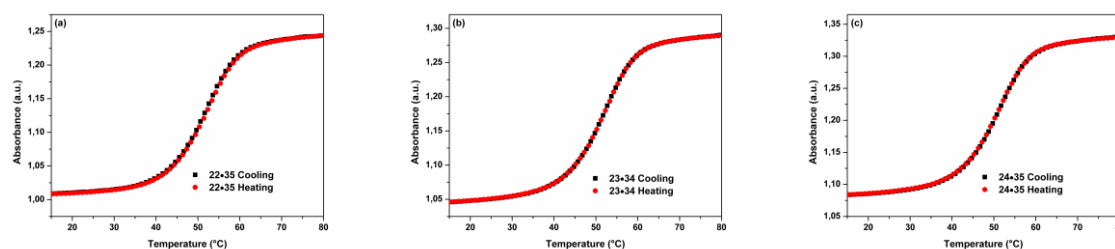

**Figure S10.** Thermal denaturation curves obtained from heating (red) and cooling (black) experiments monitored at 260 nm. (a) Duplex **22•35**; (b) duplex **23•34**; (c) duplex **24•35**. All the experiments were performed with 5  $\mu$ M duplex concentrations at a heating rate of 1.0  $^{\circ}$ C/min in 1 M NaCl, 100 mM  $\text{MgCl}_2$ , 60 mM Na-cacodylate (pH 7) buffer.

### Parallel Duplexes Containing 7-Deaza-2'-deoxyguanosine (1)

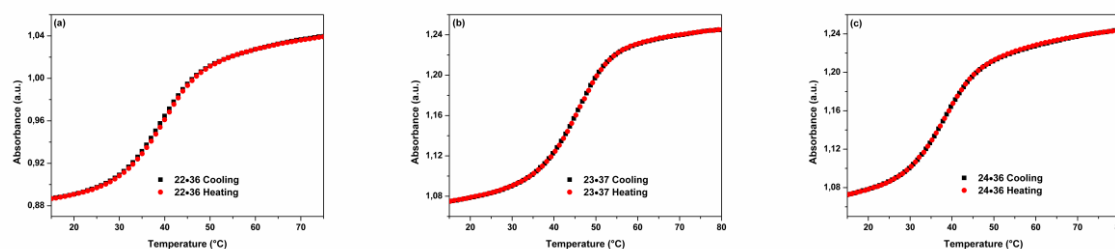

**Figure S11.** Thermal denaturation curves obtained from heating (red) and cooling (black) experiments monitored at 260 nm. (a) Duplex **22•36**; (b) duplex **23•37**; (c) duplex **24•36**.

### DNA-RNA Hybrids Containing 7-Deaza-2'-deoxyguanosine (1)

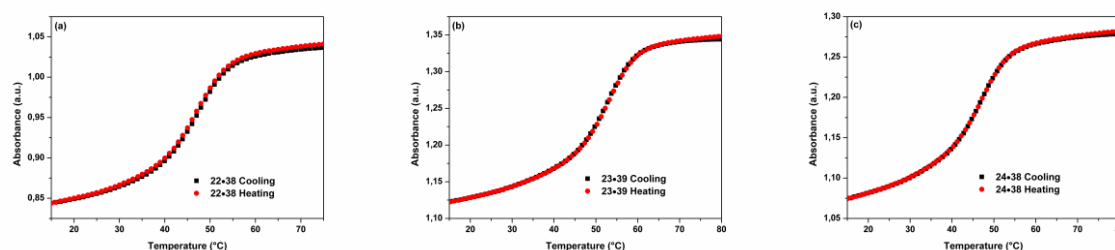

**Figure S12.** Thermal denaturation curves obtained from heating (red) and cooling (black) experiments monitored at 260 nm. (a) Duplex **22•38**; (b) duplex **23•39**; (c) duplex **24•38**.

## Antiparallel Duplexes Containing 8-Phenyl-7-deaza-2'-deoxyguanosine (2)

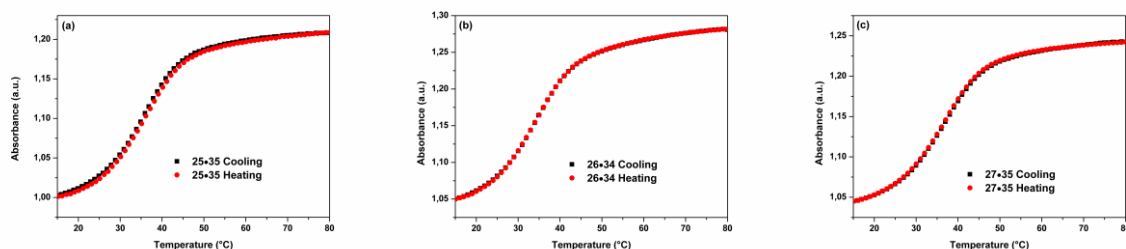

**Figure S13.** Thermal denaturation curves obtained from heating (red) and cooling (black) experiments monitored at 260 nm. (a) Duplex **25•35**; (b) duplex **26•34**; (c) duplex **27•35**. All the experiments were performed with 5  $\mu$ M duplex concentrations at a heating rate of 1.0  $^{\circ}$ C/min in 1 M NaCl, 100 mM  $\text{MgCl}_2$ , 60 mM Na-cacodylate (pH 7) buffer.

## Parallel Duplexes Containing 8-Phenyl-7-deaza-2'-deoxyguanosine (2)

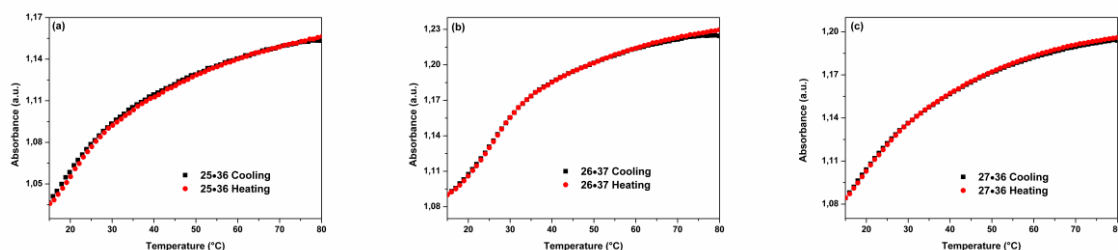

**Figure S14.** Thermal denaturation curves obtained from heating (red) and cooling (black) experiments monitored at 260 nm. (a) Duplex **25•36**; (b) duplex **26•37**; (c) duplex **27•36**.

## DNA-RNA Hybrids Containing 8-Phenyl-7-deaza-2'-deoxyguanosine (2)

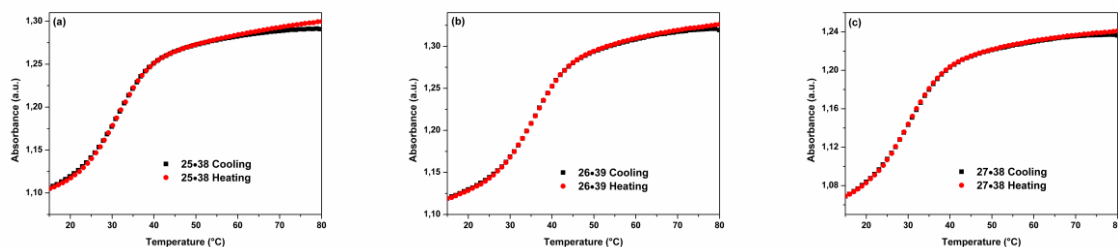

**Figure S15.** Thermal denaturation curves obtained from heating (red) and cooling (black) experiments monitored at 260 nm. (a) Duplex **25•38**; (b) duplex **26•39**; (c) duplex **27•38**.

### Antiparallel Duplexes Containing 7-Phenyl-7-deaza-2'-deoxyguanosine (3)

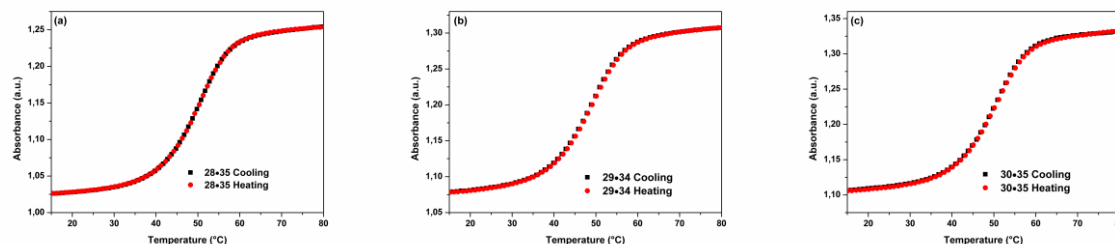

**Figure S16.** Thermal denaturation curves obtained from heating (red) and cooling (black) experiments monitored at 260 nm. (a) Duplex **28•35**; (b) duplex **29•34**; (c) duplex **30•35**. All the experiments were performed with 5  $\mu$ M duplex concentrations at a heating rate of 1.0  $^{\circ}$ C/min in 1 M NaCl, 100 mM MgCl<sub>2</sub>, 60 mM Na-cacodylate (pH 7) buffer.

### Parallel Duplexes Containing 7-Phenyl-7-deaza-2'-deoxyguanosine (3)

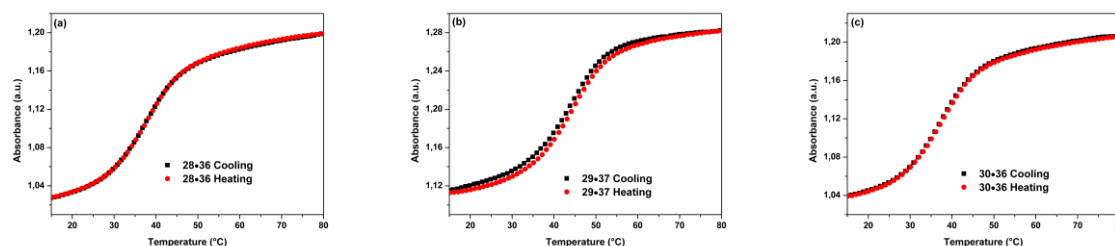

**Figure S17.** Thermal denaturation curves obtained from heating (red) and cooling (black) experiments monitored at 260 nm. (a) Duplex **28•36**; (b) duplex **29•37**; (c) duplex **30•36**.

### DNA-RNA Hybrids Containing 7-Phenyl-7-deaza-2'-deoxyguanosine (3)

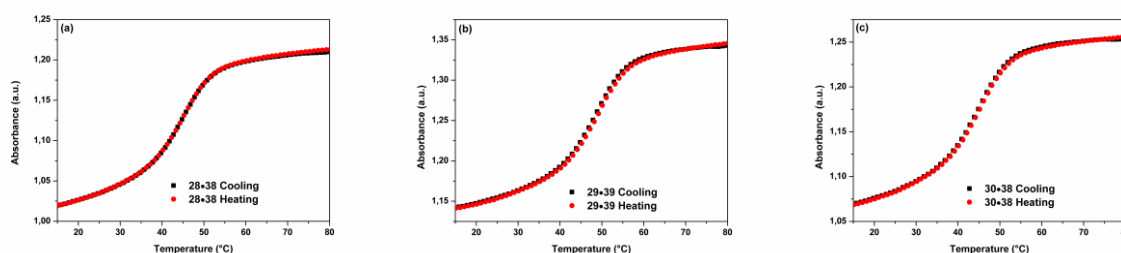

**Figure S18.** Thermal denaturation curves obtained from heating (red) and cooling (black) experiments monitored at 260 nm. (a) Duplex **28•38**; (b) duplex **29•39**; (c) duplex **30•38**.

### Antiparallel Duplexes Containing 7-Phenyltriazolyl-7-deaza-2'-deoxyguanosine (4)

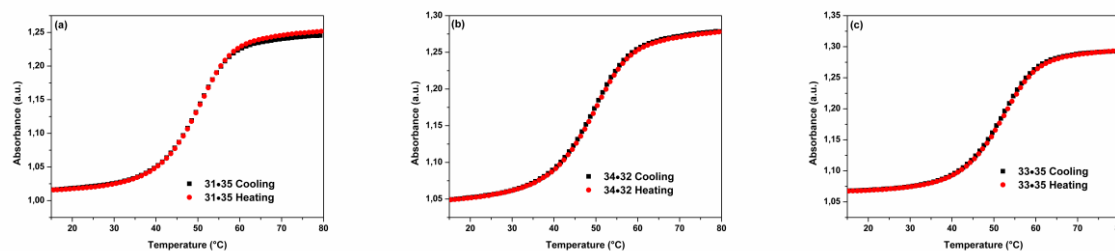

**Figure S19.** Thermal denaturation curves obtained from heating (red) and cooling (black) experiments monitored at 260 nm. (a) Duplex **31•35**; (b) duplex **32•34**; (c) duplex **33•35**. All the experiments were performed with 5  $\mu$ M duplex concentrations at a heating rate of 1.0  $^{\circ}$ C/min in 1 M NaCl, 100 mM  $\text{MgCl}_2$ , 60 mM Na-cacodylate (pH 7) buffer.

### Parallel Duplexes Containing 7-Phenyltriazolyl-7-deaza-2'-deoxyguanosine (4)

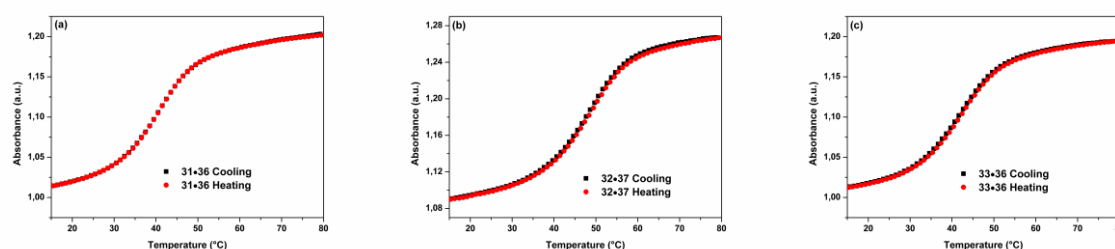

**Figure S20.** Thermal denaturation curves obtained from heating (red) and cooling (black) experiments monitored at 260 nm. (a) Duplex **31•36**; (b) duplex **32•37**; (c) duplex **33•36**.

### DNA-RNA Hybrids Containing 7-Phenyltriazolyl-7-deaza-2'-deoxyguanosine (4)

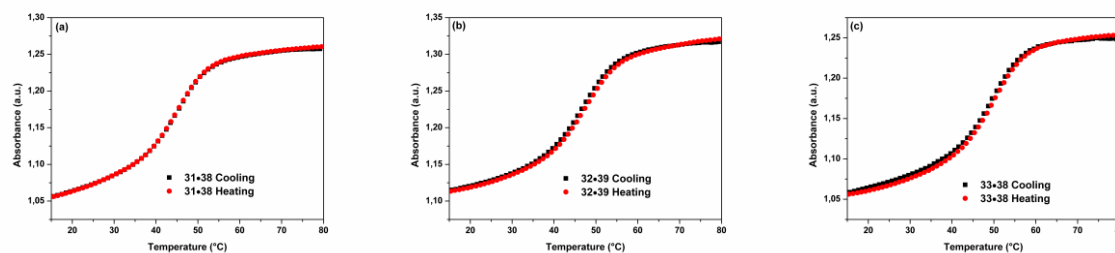

**Figure S21.** Thermal denaturation curves obtained from heating (red) and cooling (black) experiments monitored at 260 nm. (a) Duplex **31•38**; (b) duplex **32•39**; (c) duplex **33•38**.

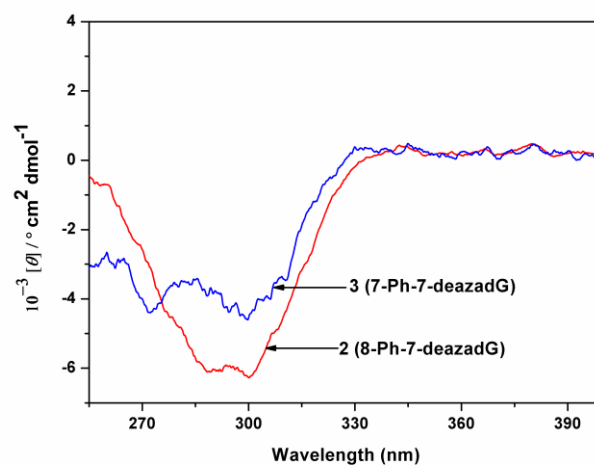

**Figure S22.** CD spectra of nucleosides **2-3**. Measurements were performed in 1 M NaCl, 100 mM MgCl<sub>2</sub>, and 60 mM Na-cacodylate (pH 7.0) at 5 °C.

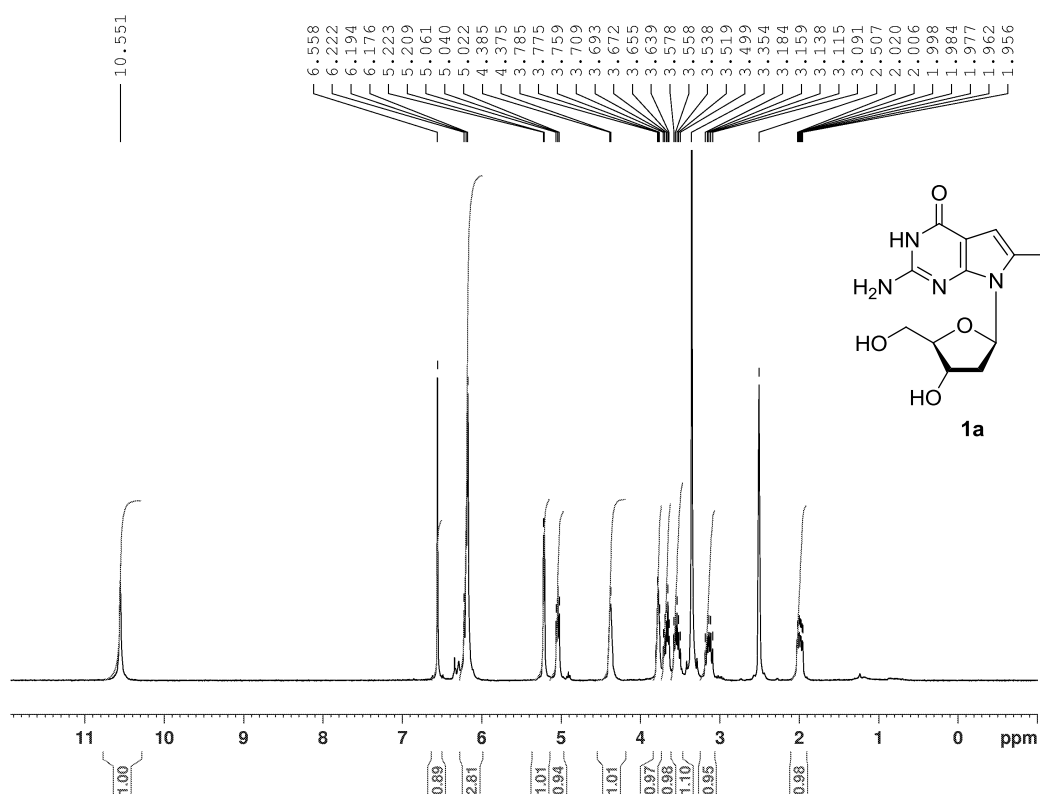

**Figure 23.** <sup>1</sup>H NMR spectrum of compound **1a**.

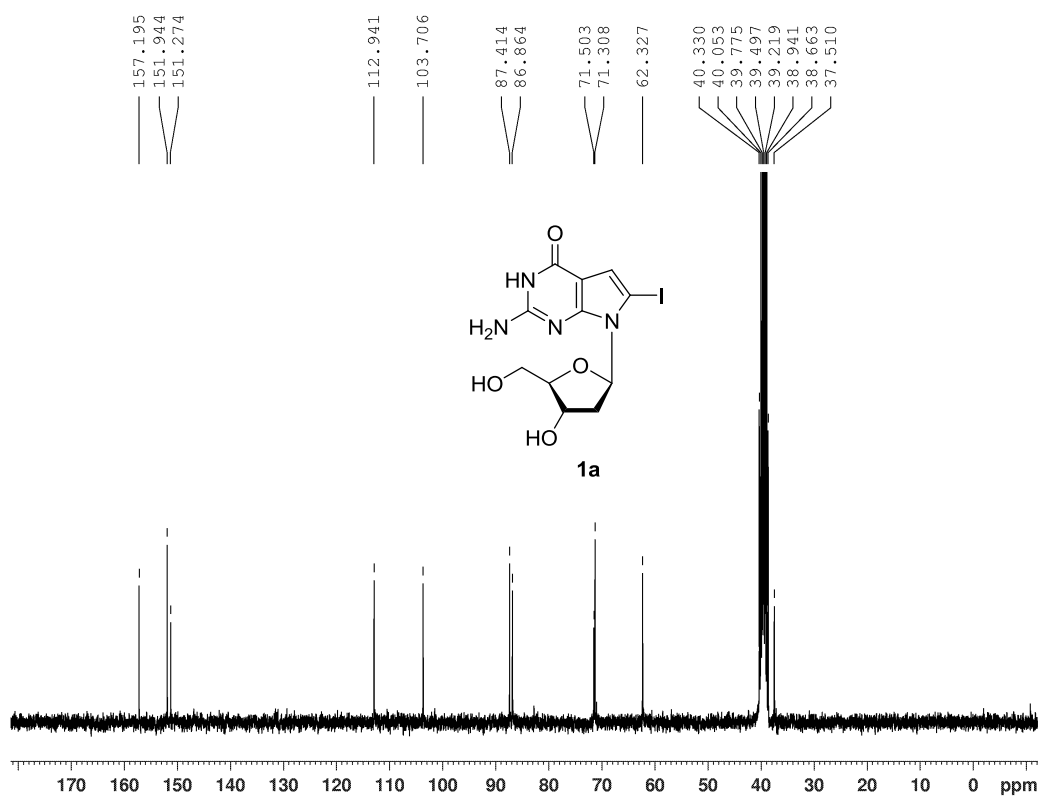

**Figure 24.** <sup>13</sup>C NMR spectrum of compound **1a**.



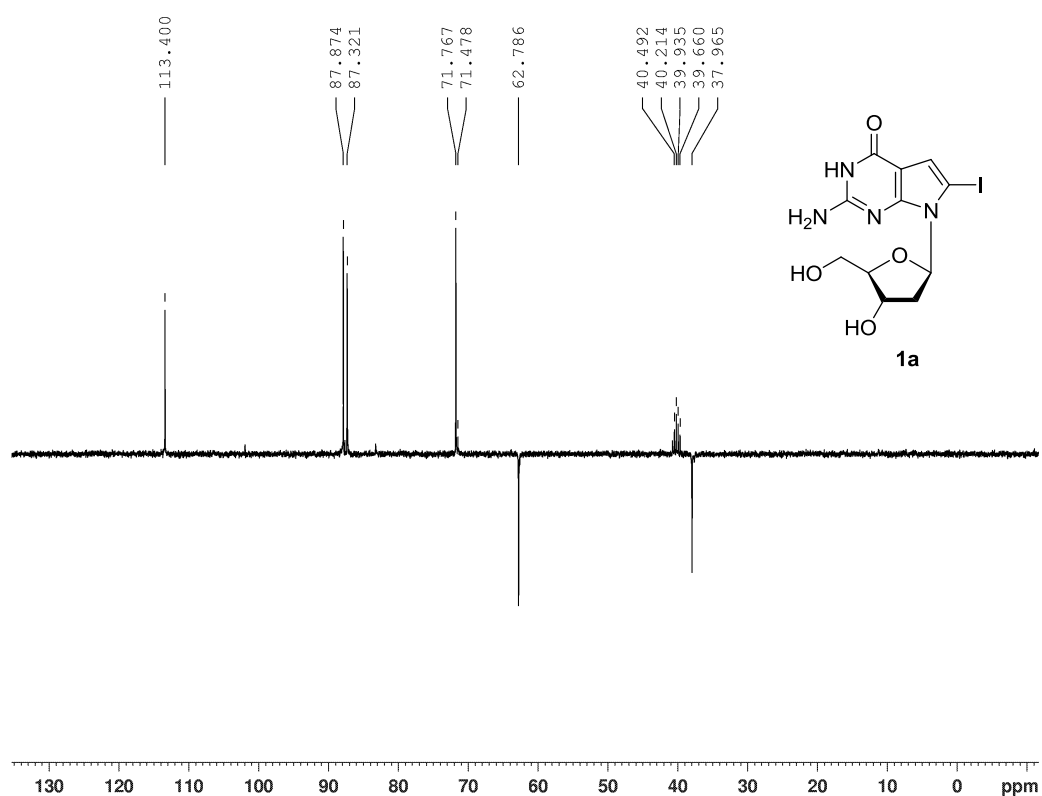

**Figure 25.** DEPT-135 NMR spectrum of compound **1a**.

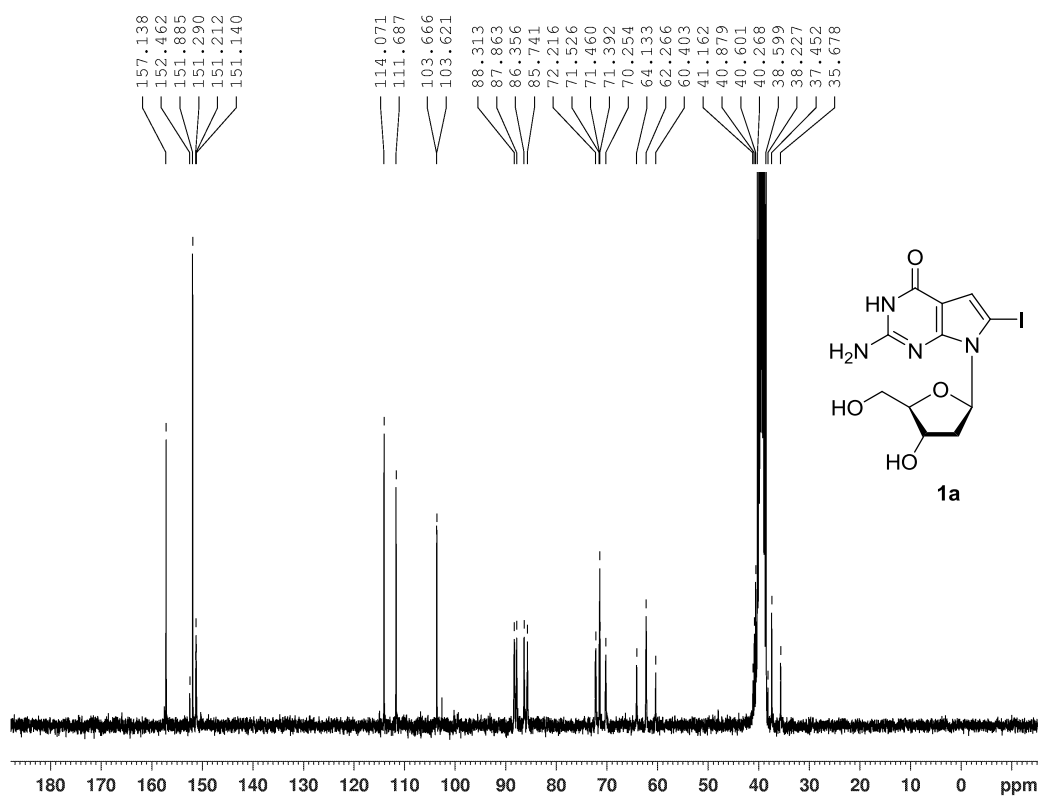

**Figure 26.**  $^1\text{H}$ - $^{13}\text{C}$  gated-decoupled NMR spectrum of compound **1a**.

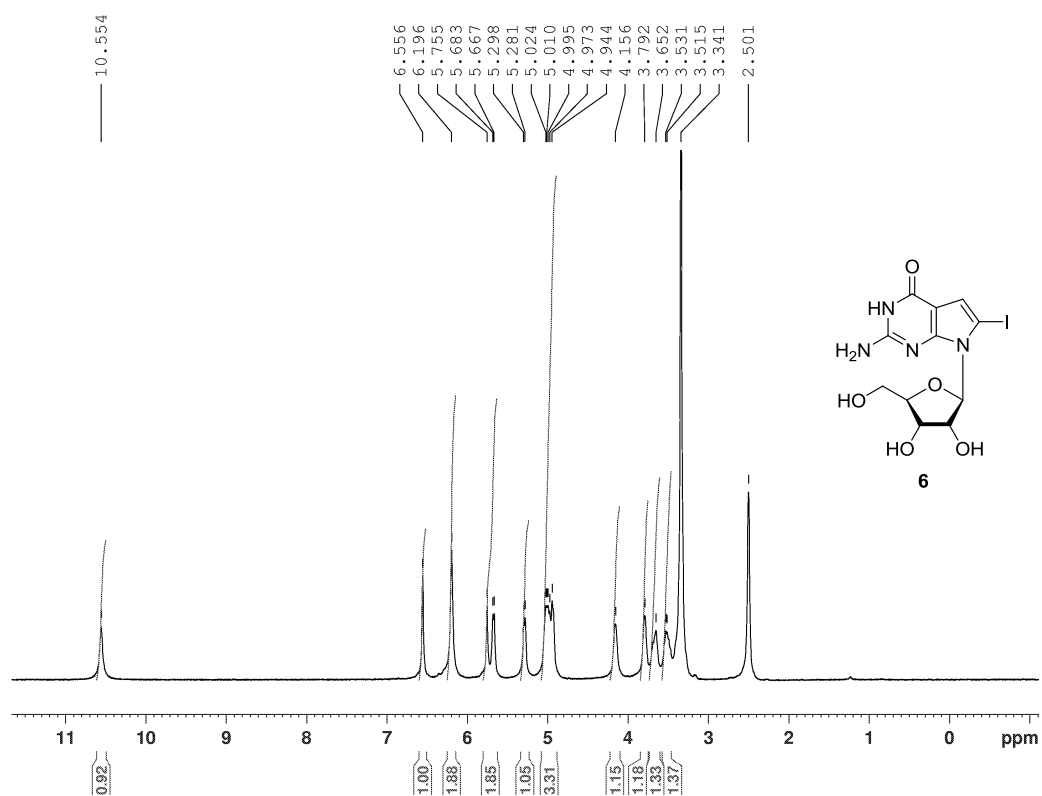

**Figure 27.**  $^1\text{H}$  NMR spectrum of compound 6.

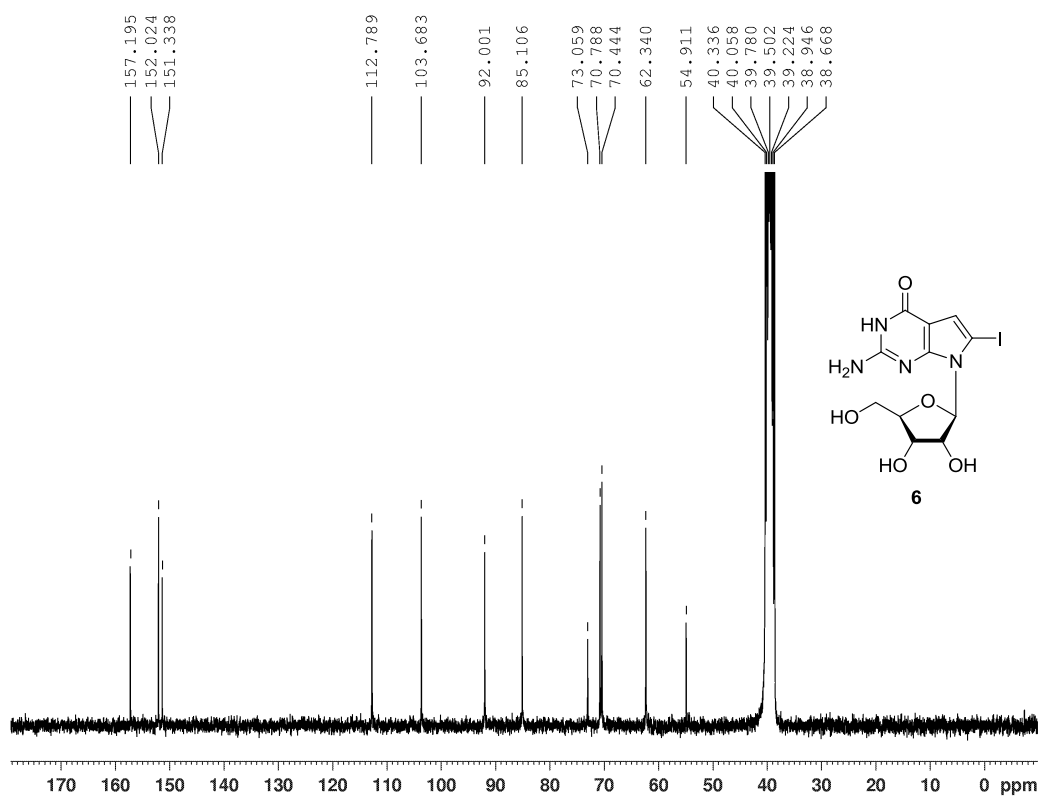

**Figure 28.**  $^{13}\text{C}$  NMR spectrum of compound 6.

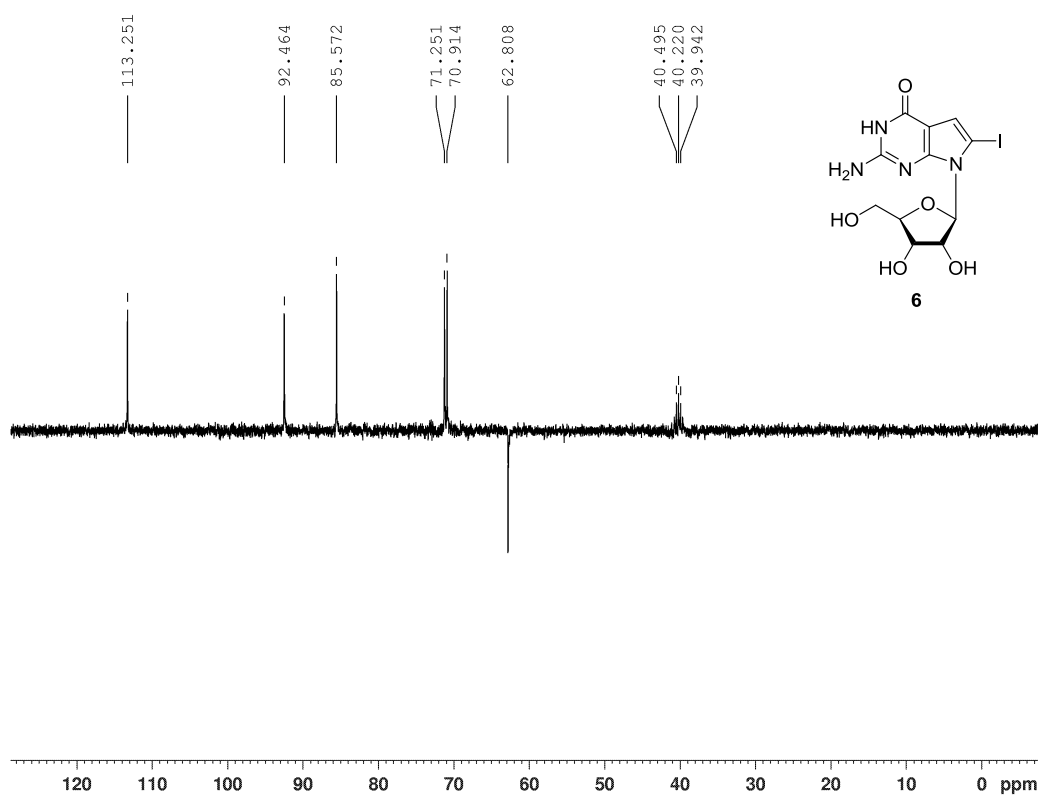

**Figure 29.** DEPT-135 NMR spectrum of compound 6.

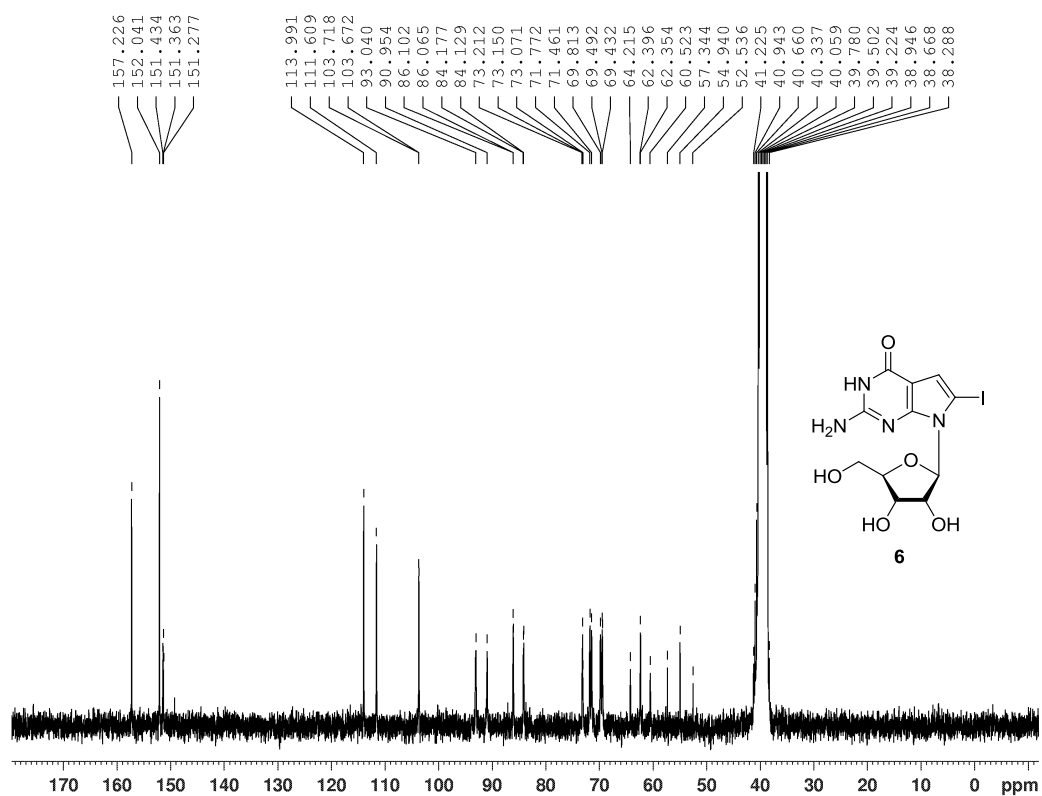

**Figure 30.**  $^1\text{H}$ - $^{13}\text{C}$  gated-decoupled NMR spectrum of compound 6.

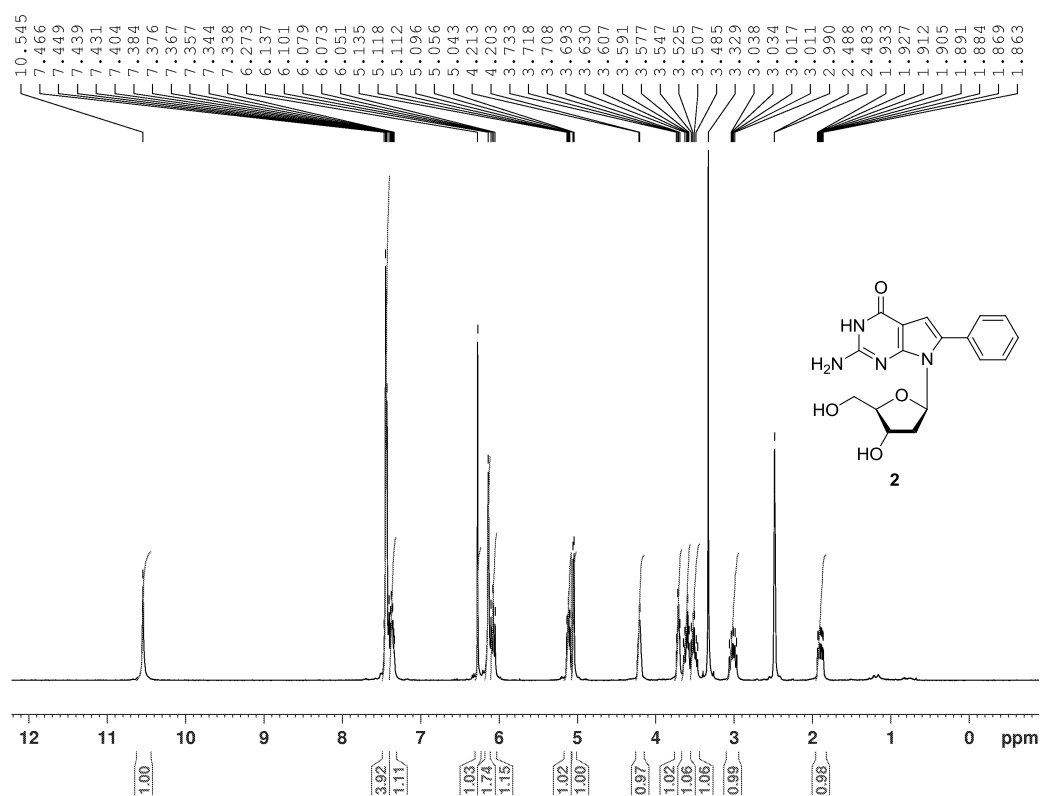

**Figure 31.** <sup>1</sup>H NMR spectrum of compound 2.

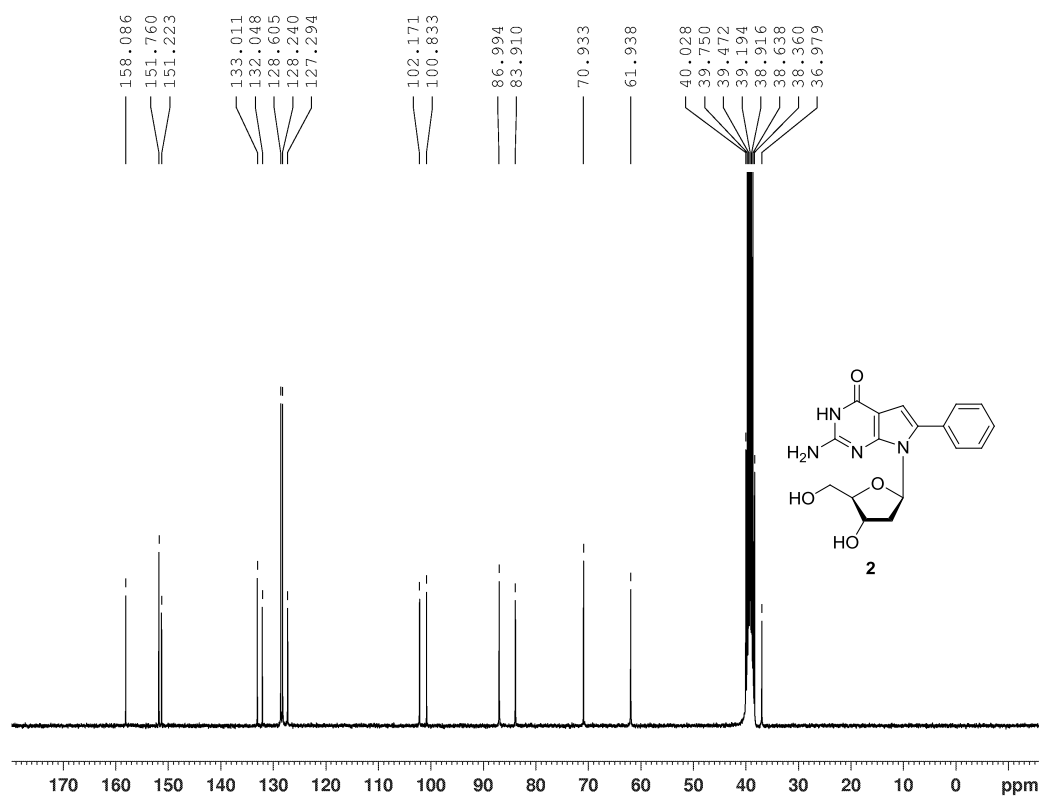

**Figure 32.** <sup>13</sup>C NMR spectrum of compound 2.

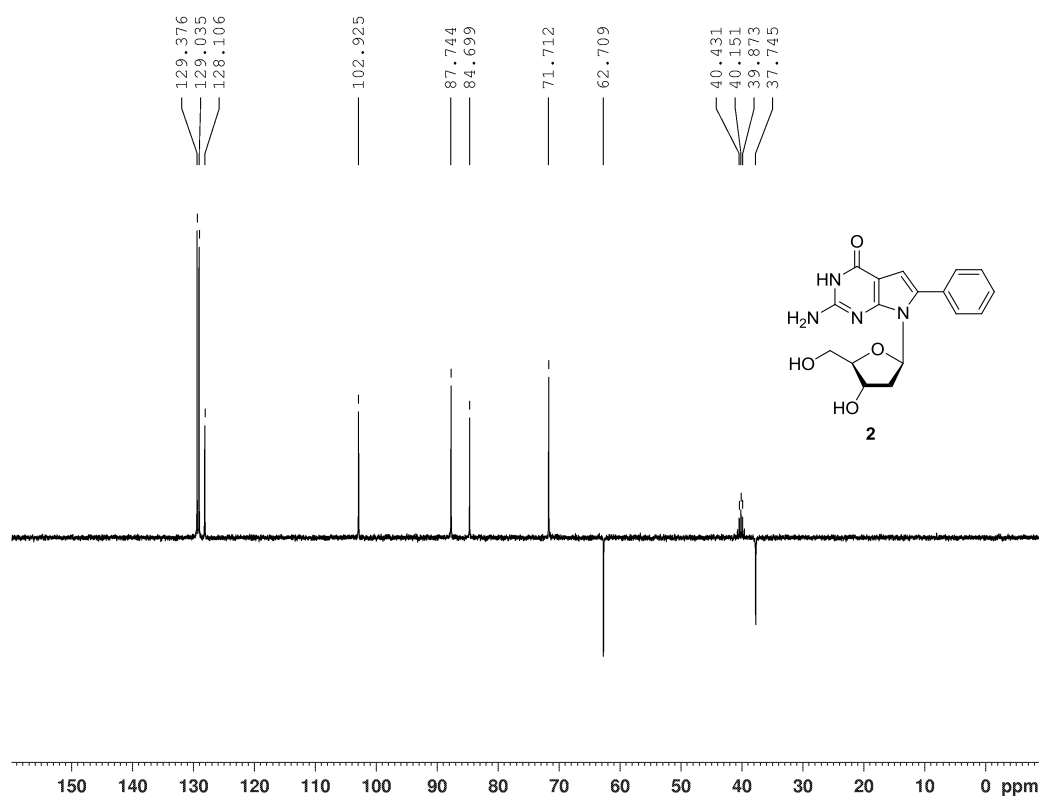

**Figure 33.** DEPT-135 NMR spectrum of compound 2.

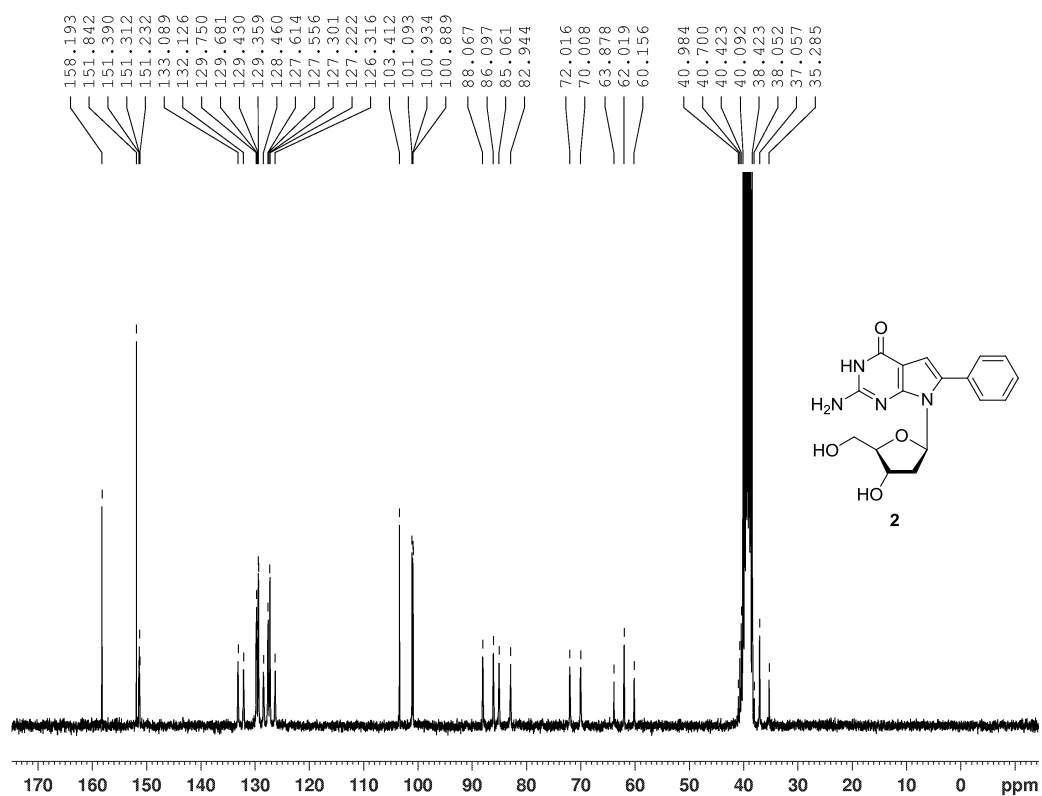

**Figure 34.**  $^1\text{H}$ - $^{13}\text{C}$  gated-decoupled NMR spectrum of compound 2.

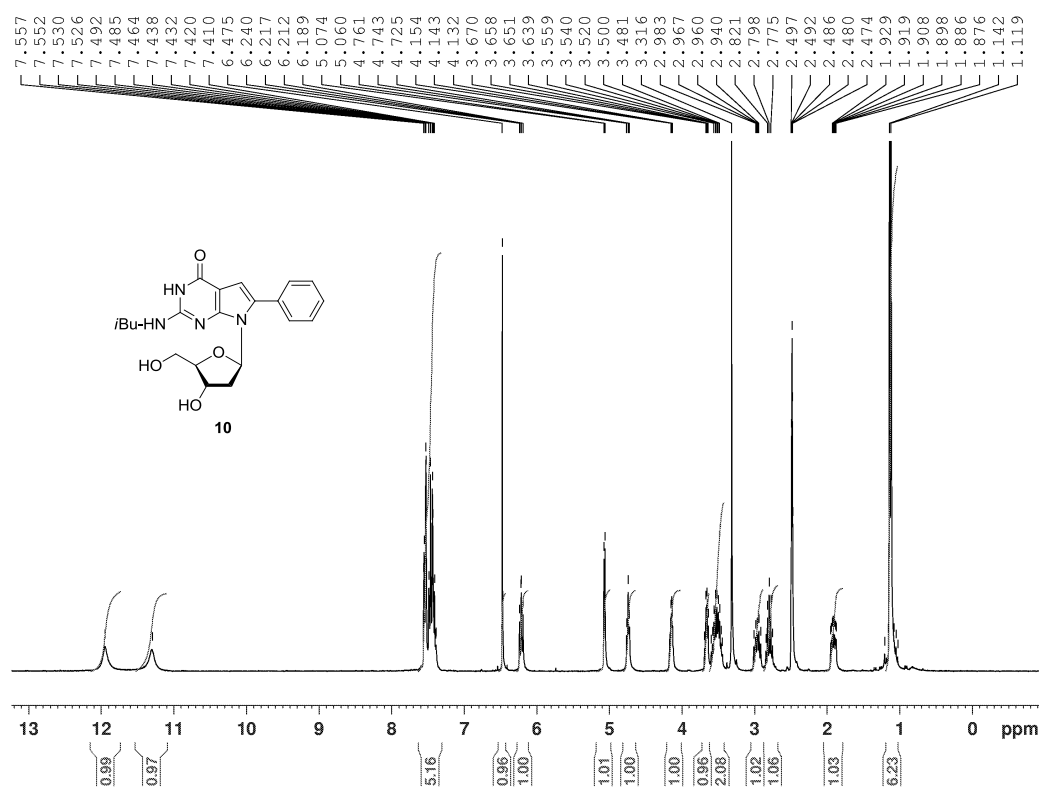

Figure 35. <sup>1</sup>H NMR spectrum of compound 10.

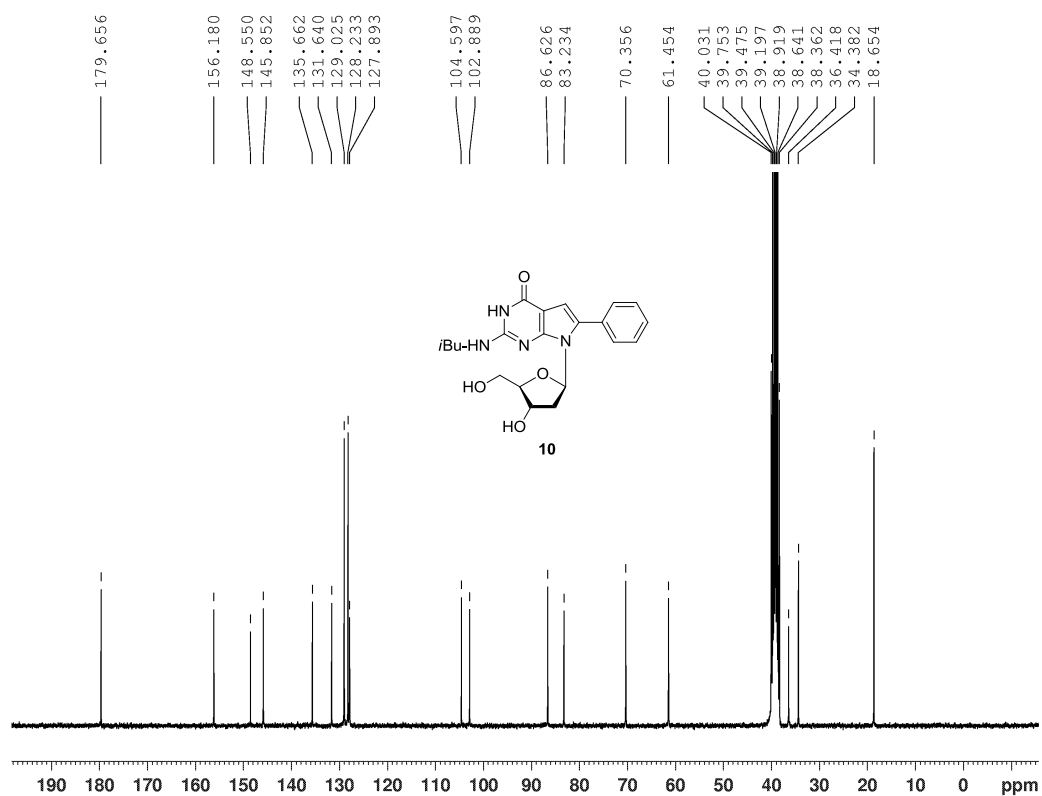

Figure 36. <sup>13</sup>C NMR spectrum of compound 10.

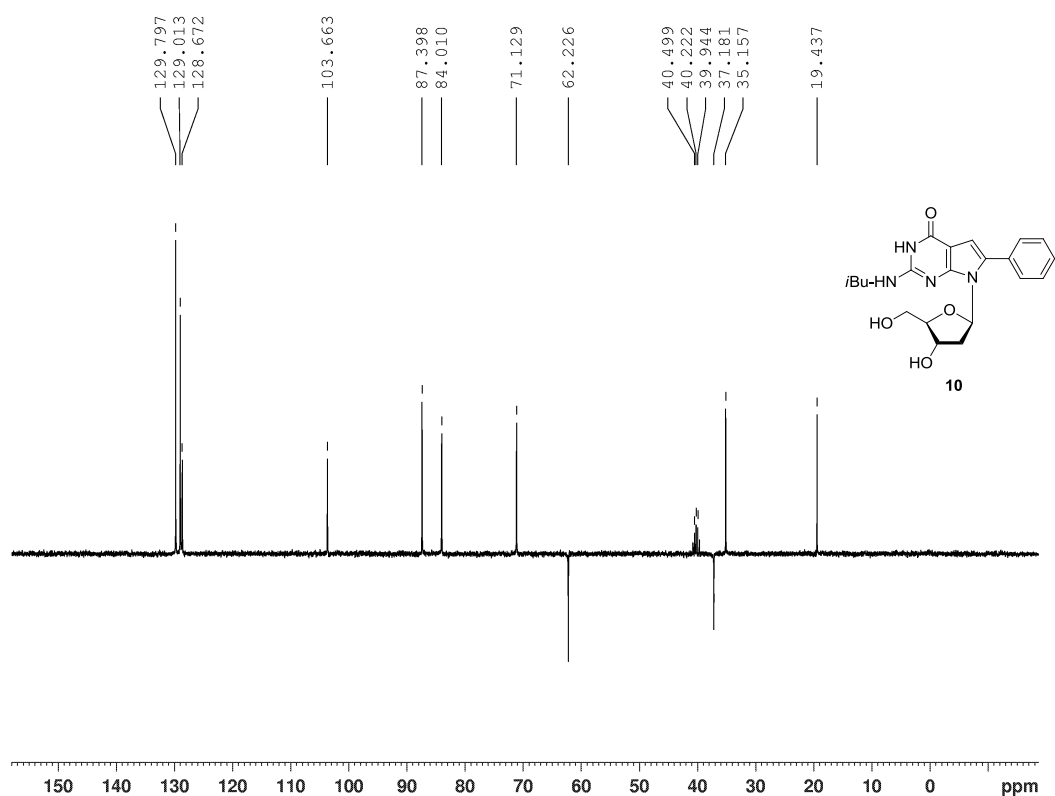

Figure 37. DEPT-135 NMR spectrum of compound 10.

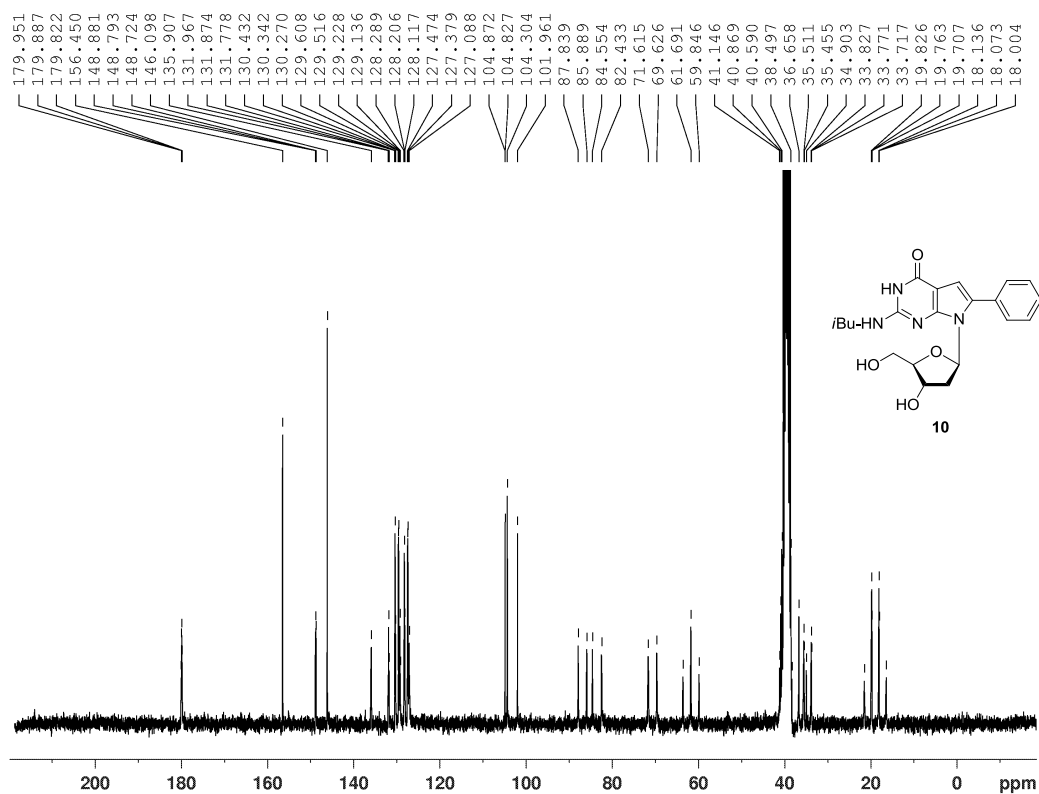

Figure 38.  $^1\text{H}$ - $^{13}\text{C}$  gated-decoupled NMR spectrum of compound 10.

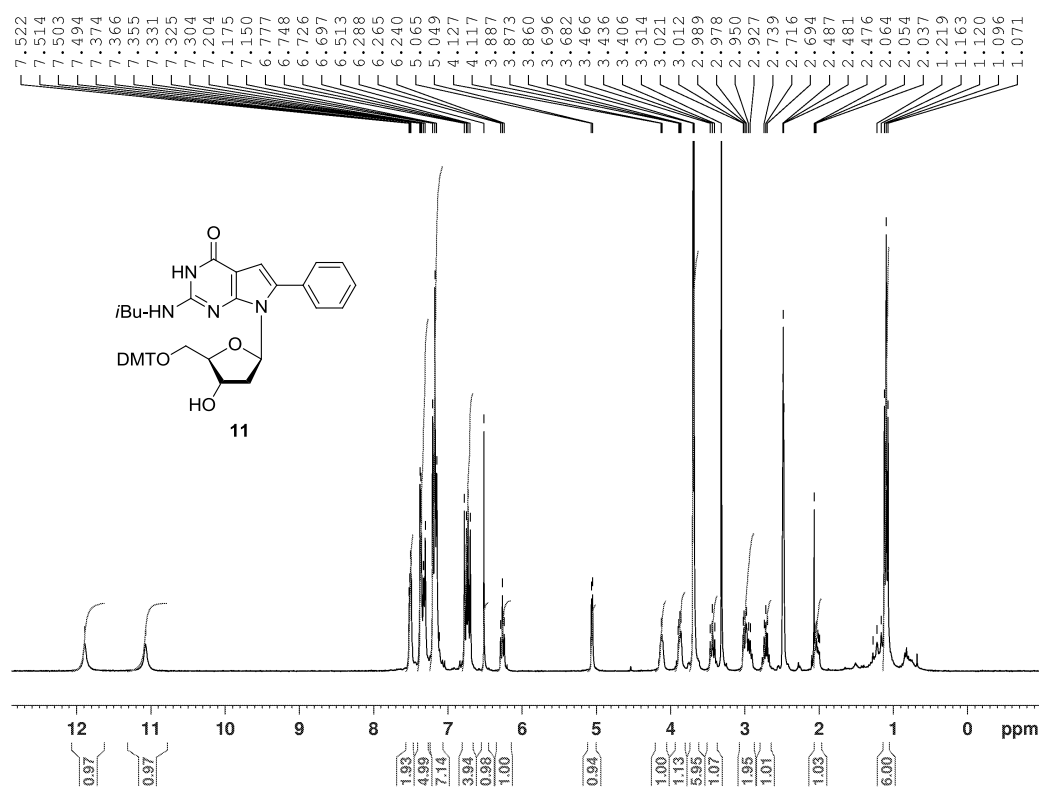

Figure 39. <sup>1</sup>H NMR spectrum of compound 11.

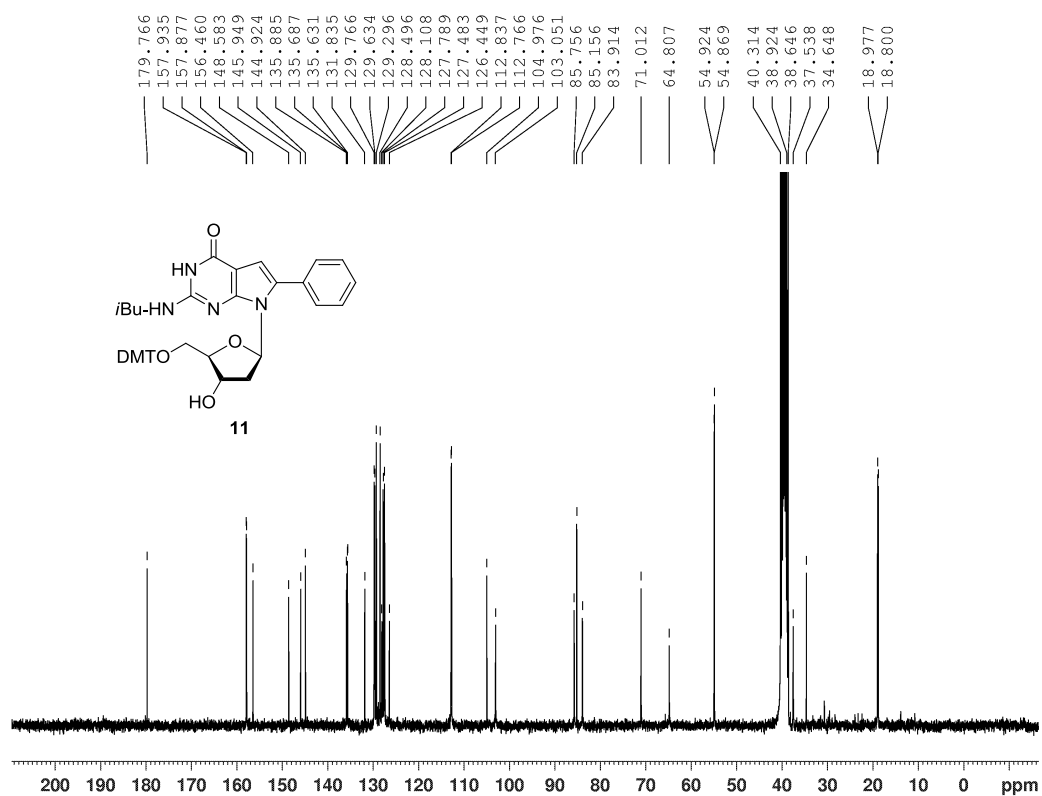

Figure 40. <sup>13</sup>C NMR spectrum of compound 11.



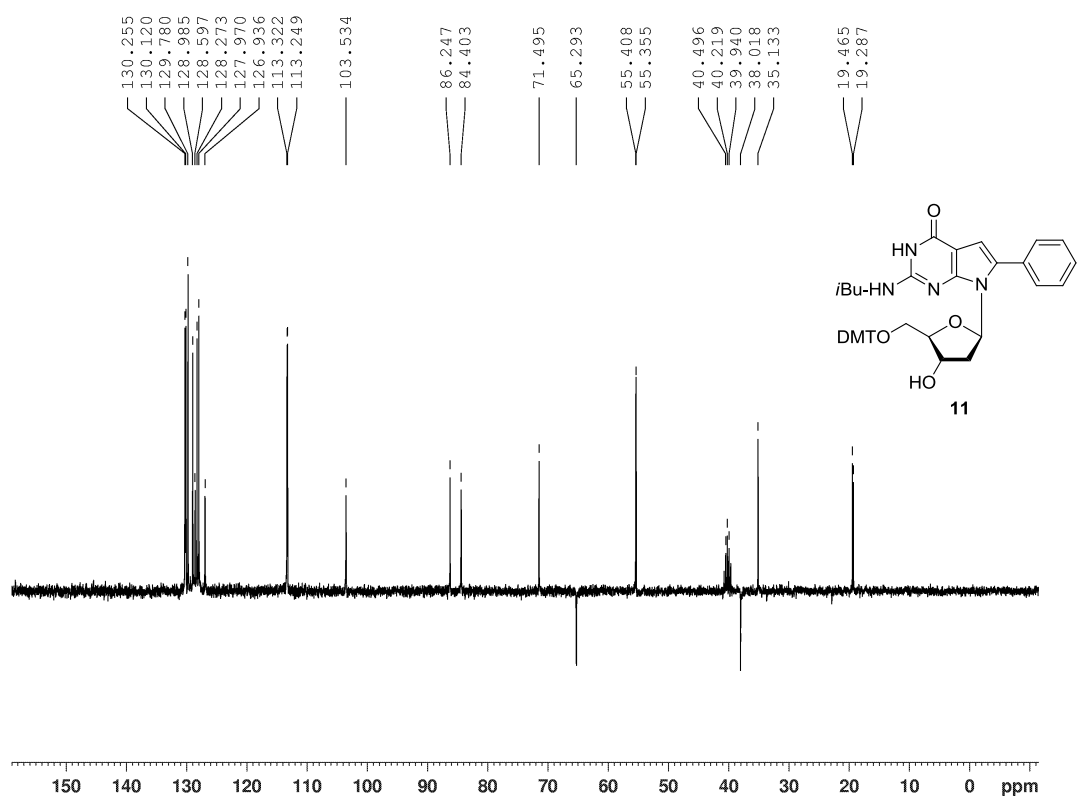

Figure 41. DEPT-135 NMR spectrum of compound 11.

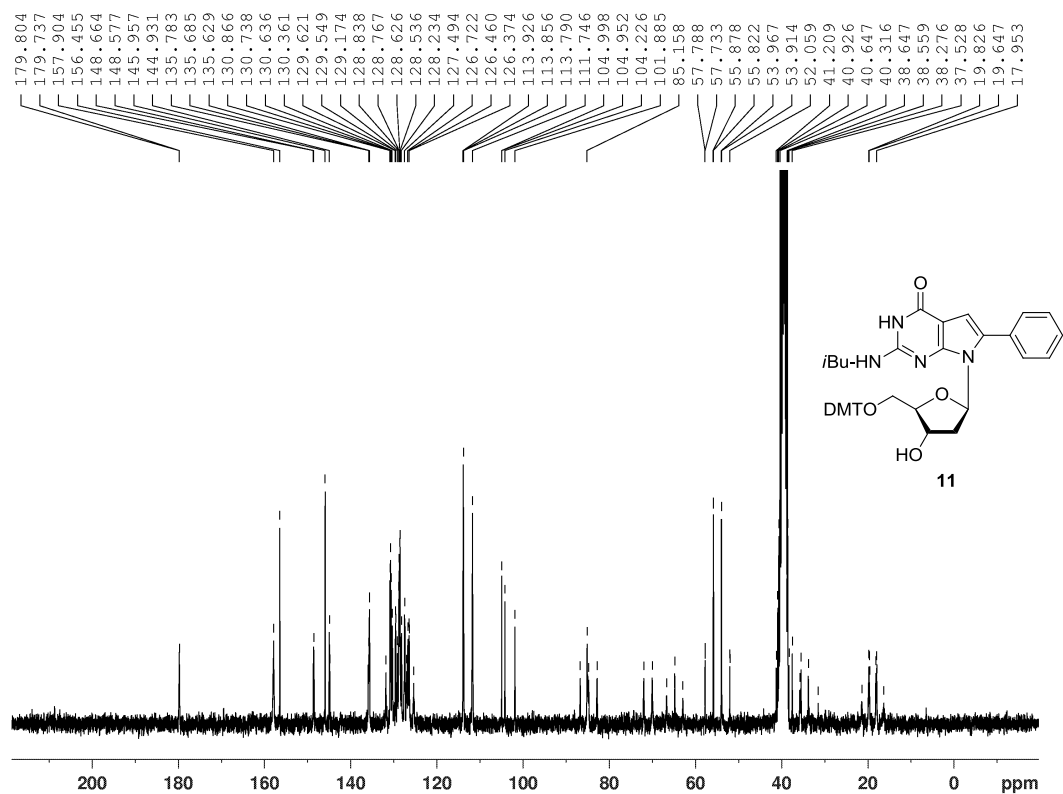

Figure 42.  $^1\text{H}$ - $^{13}\text{C}$  gated-decoupled NMR spectrum of compound 11.

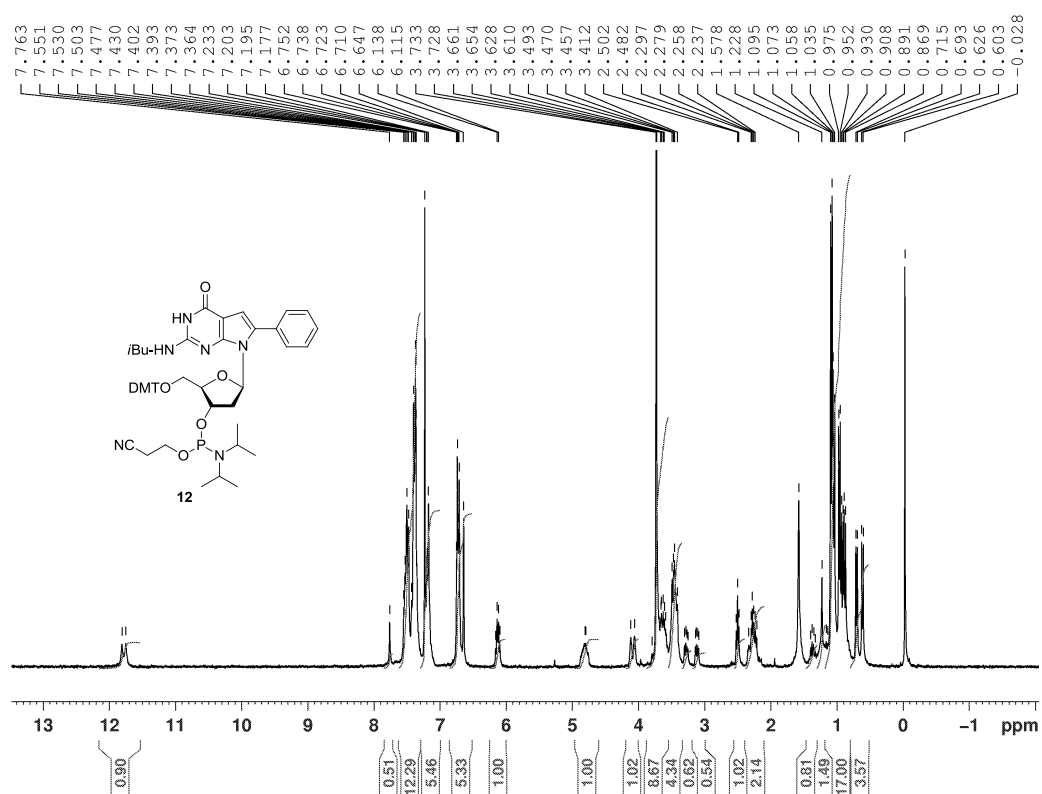

**Figure 43.** <sup>1</sup>H NMR spectrum of compound 12.

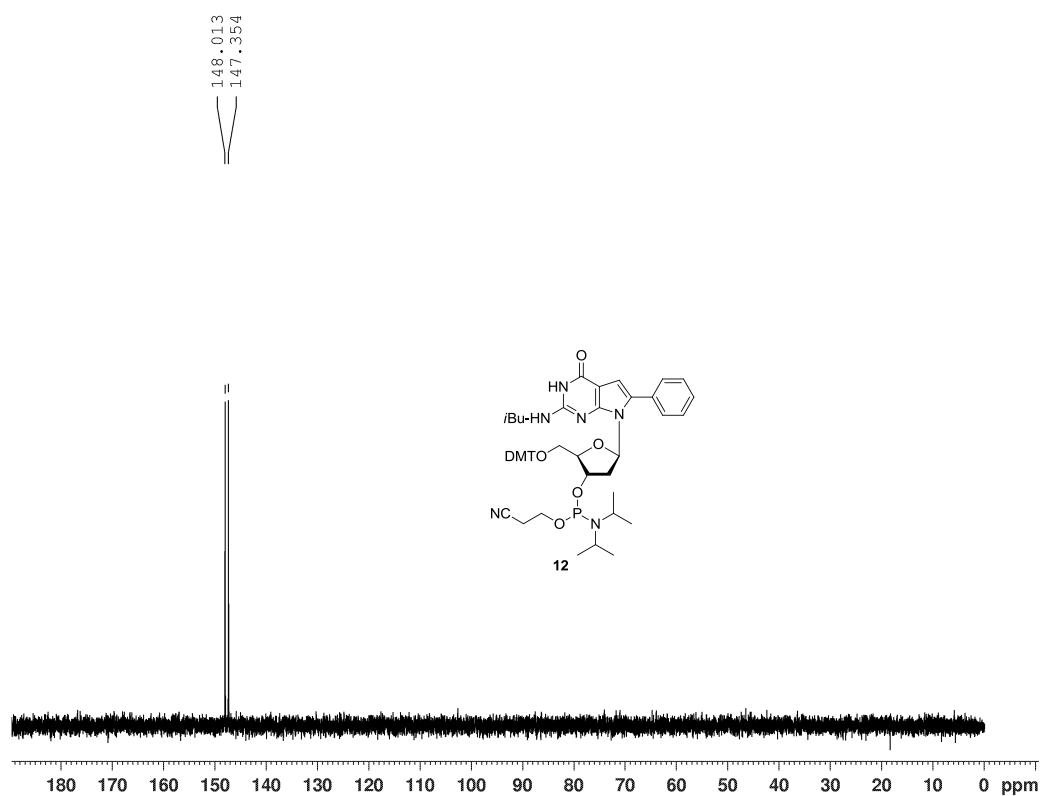

**Figure 44.** <sup>31</sup>P NMR spectrum of compound 12.

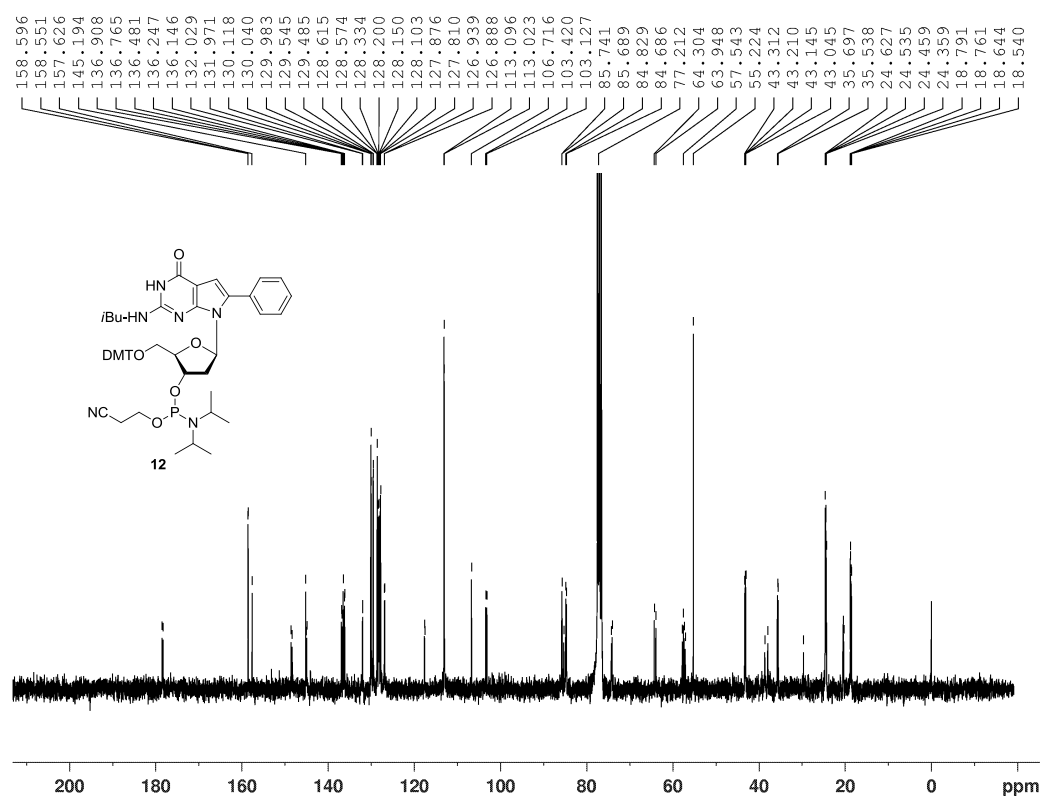

Figure 45. <sup>13</sup>C NMR spectrum of compound 12.

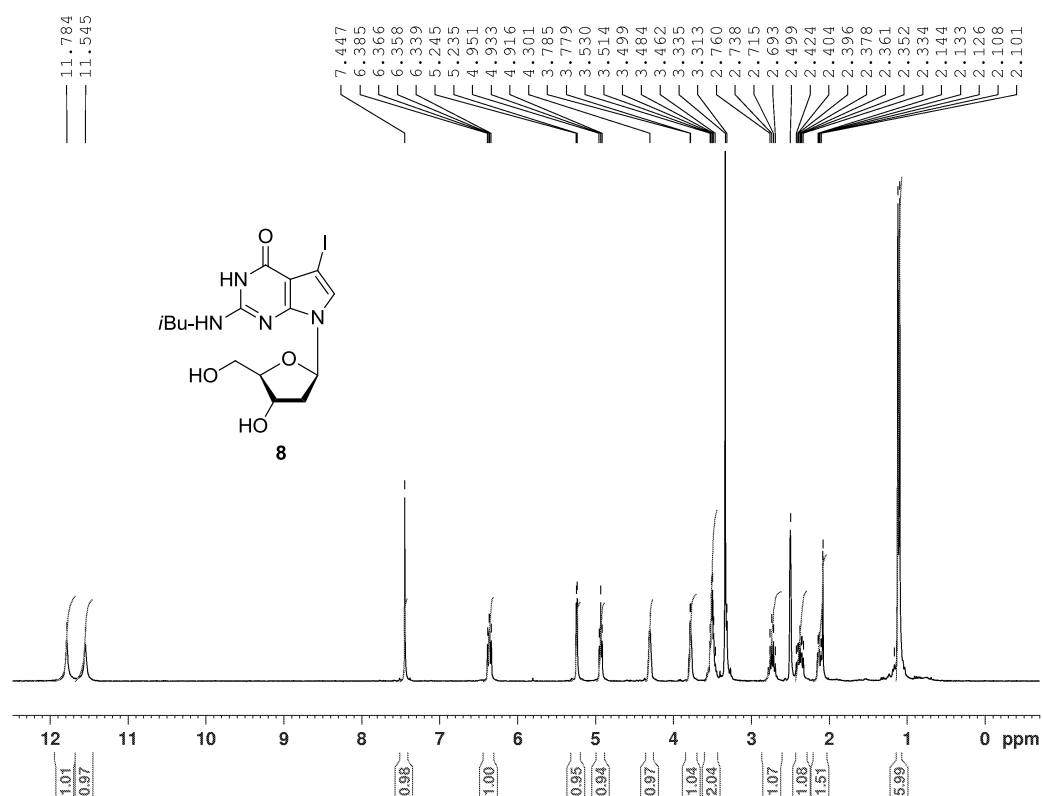

Figure 46. <sup>1</sup>H NMR spectrum of compound 8.

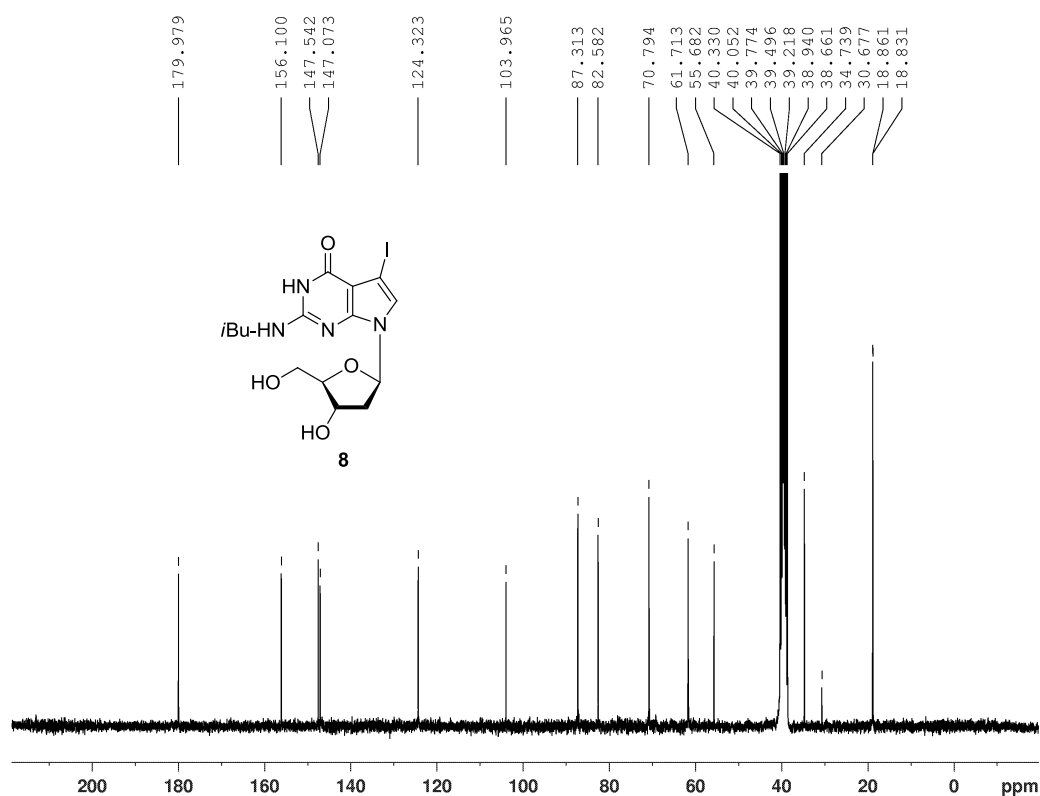

Figure 47. <sup>13</sup>C NMR spectrum of compound 8.

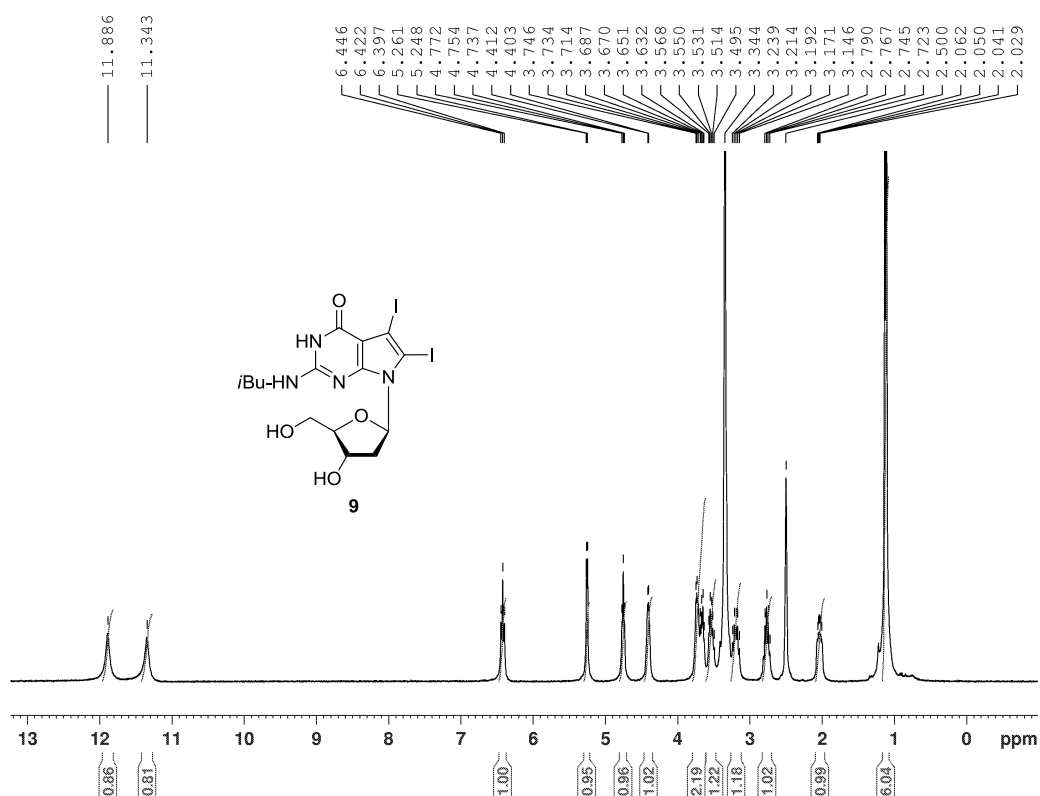

Figure 48. <sup>1</sup>H NMR spectrum of compound 9.

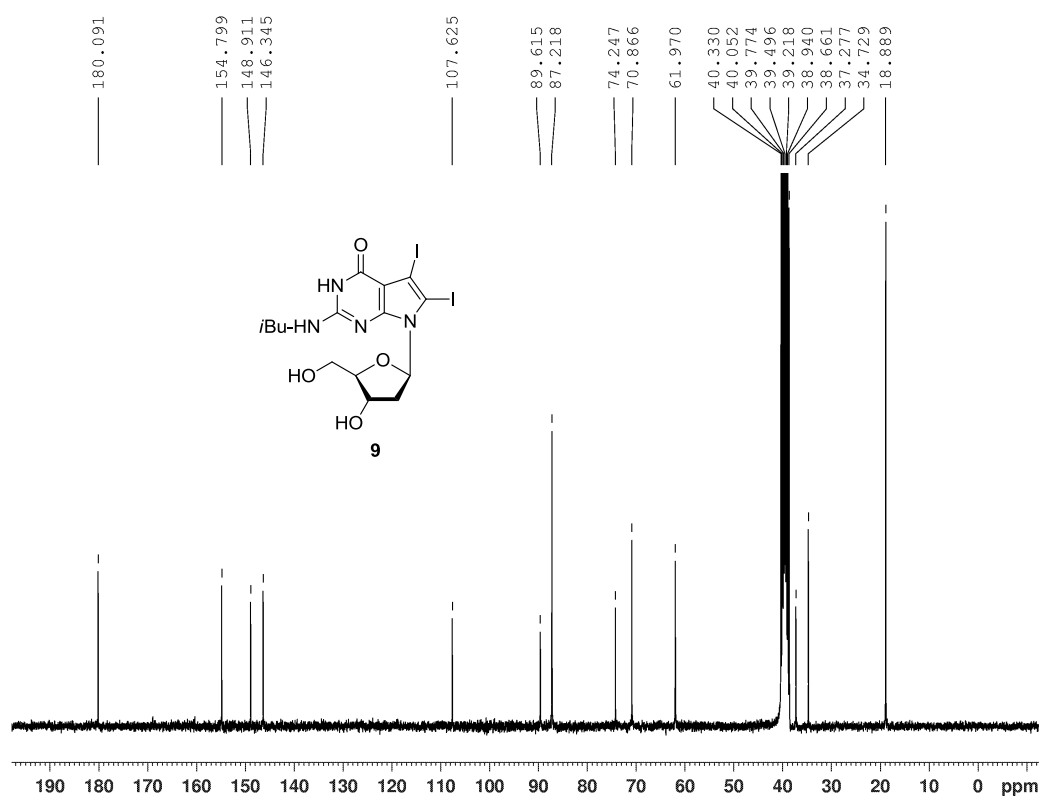

Figure 49. <sup>13</sup>C NMR spectrum of compound 9.

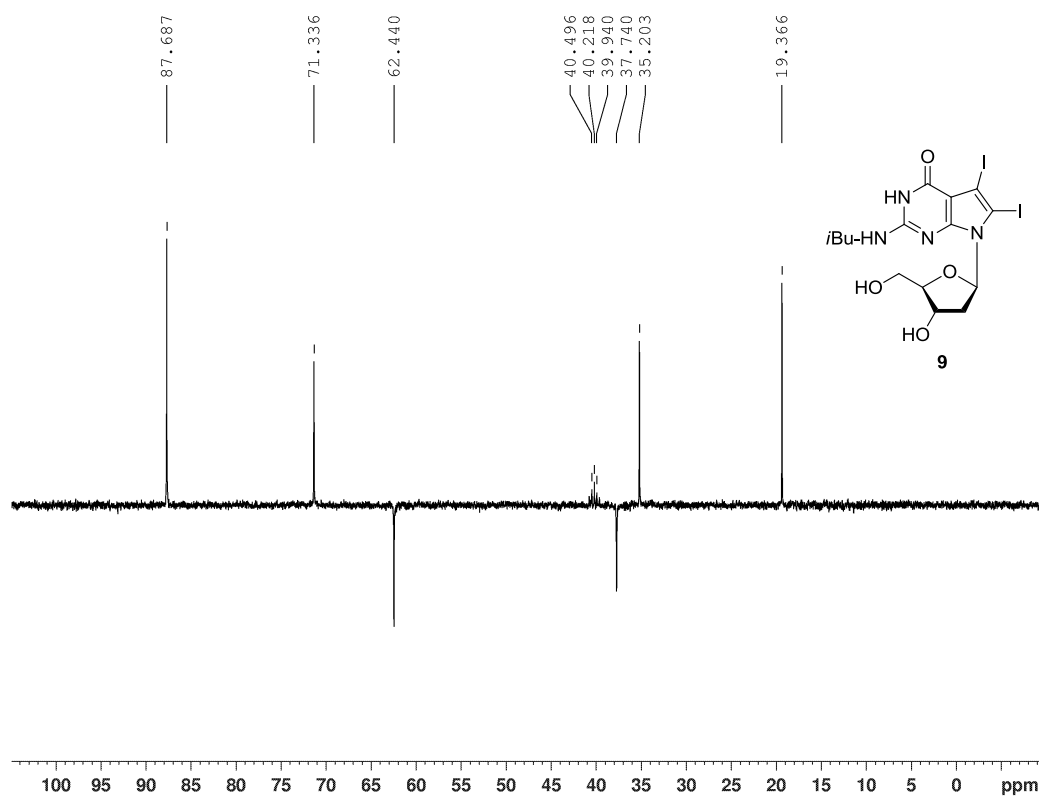

Figure 50. DEPT-135 NMR spectrum of compound 9.

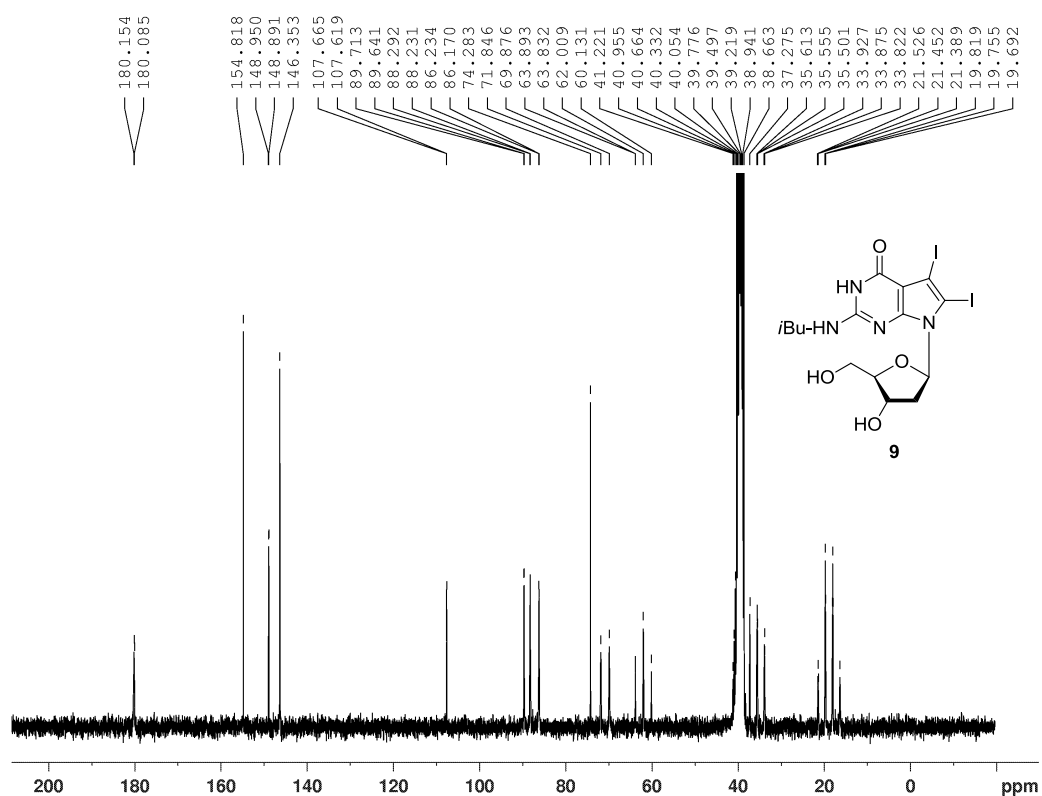

**Figure 51.**  $^1\text{H}$ - $^{13}\text{C}$  gated-decoupled NMR spectrum of compound **9**.

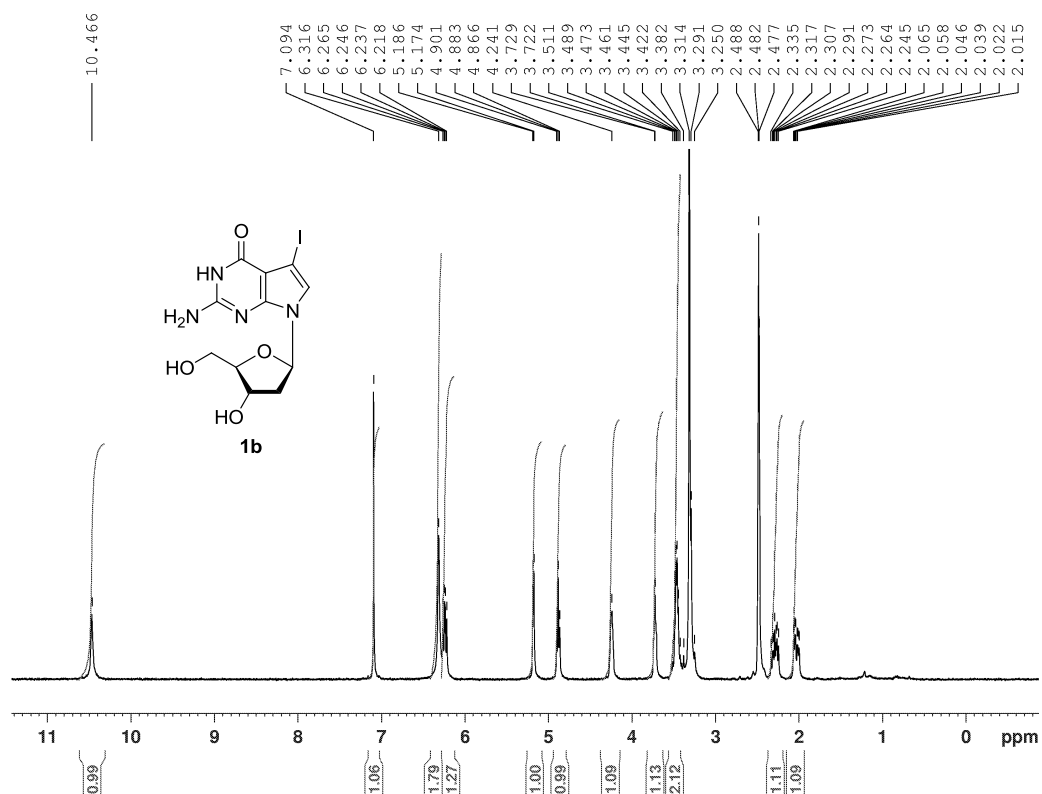

**Figure 52.**  $^1\text{H}$  NMR spectrum of compound **1b**.

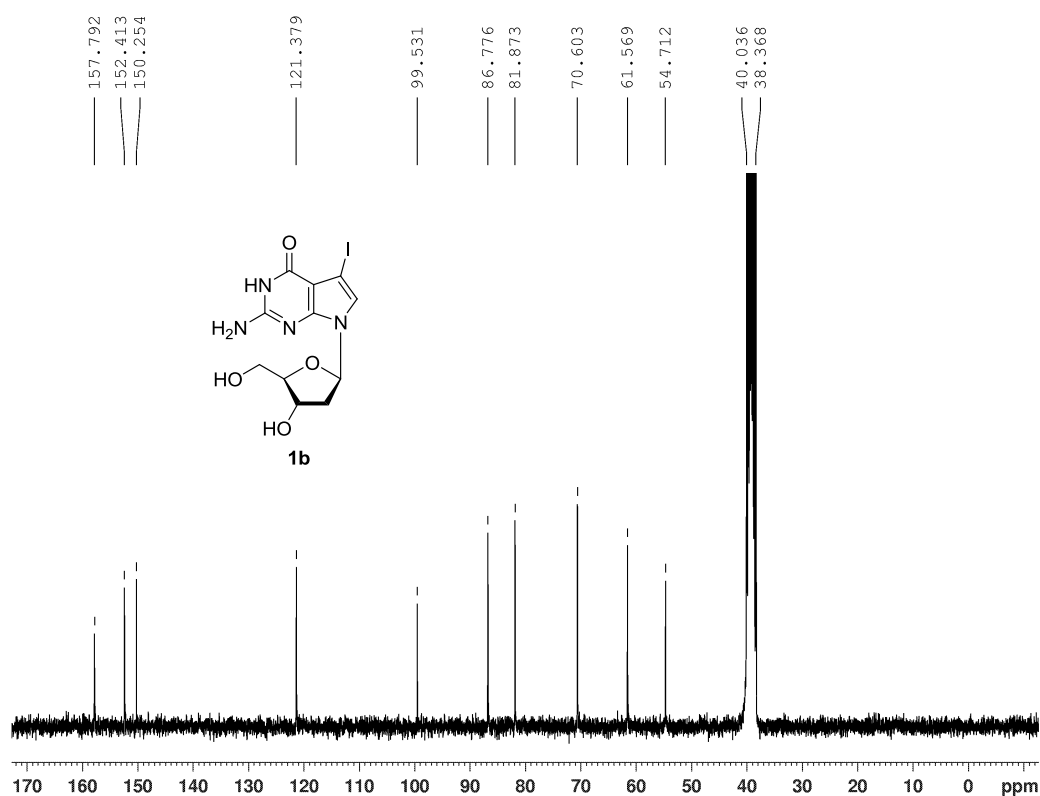

**Figure 53.** <sup>13</sup>C NMR spectrum of compound **1b**.

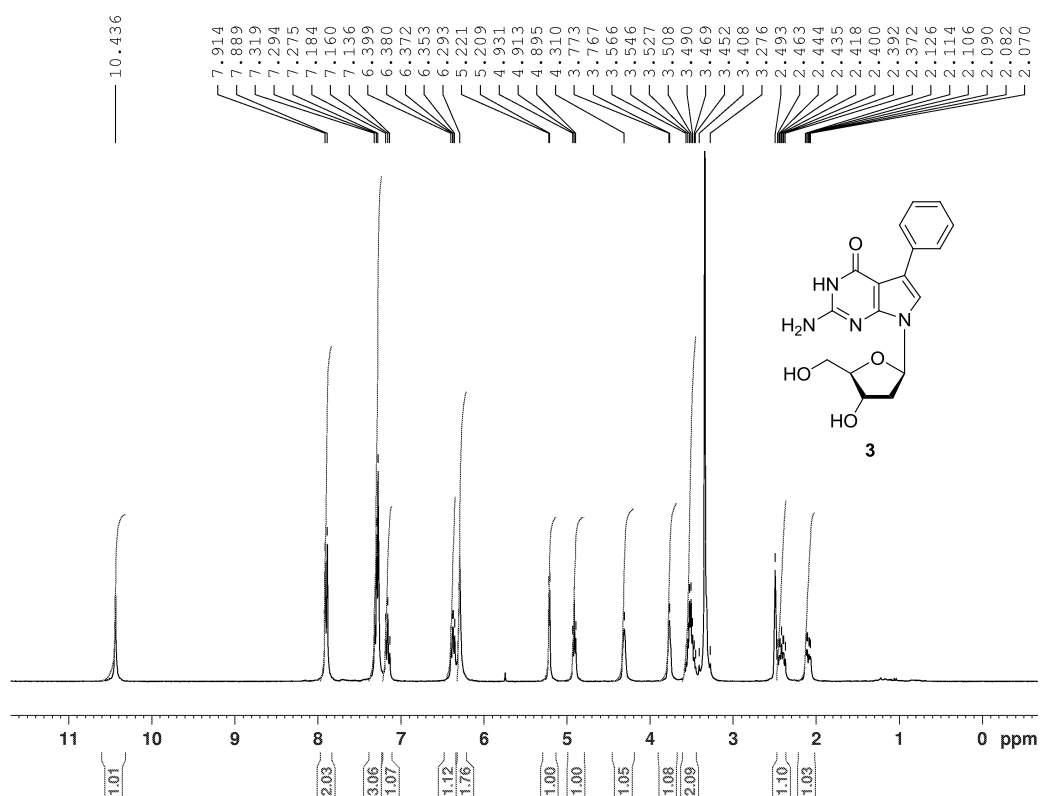

**Figure 54.** <sup>1</sup>H NMR spectrum of compound **3**.

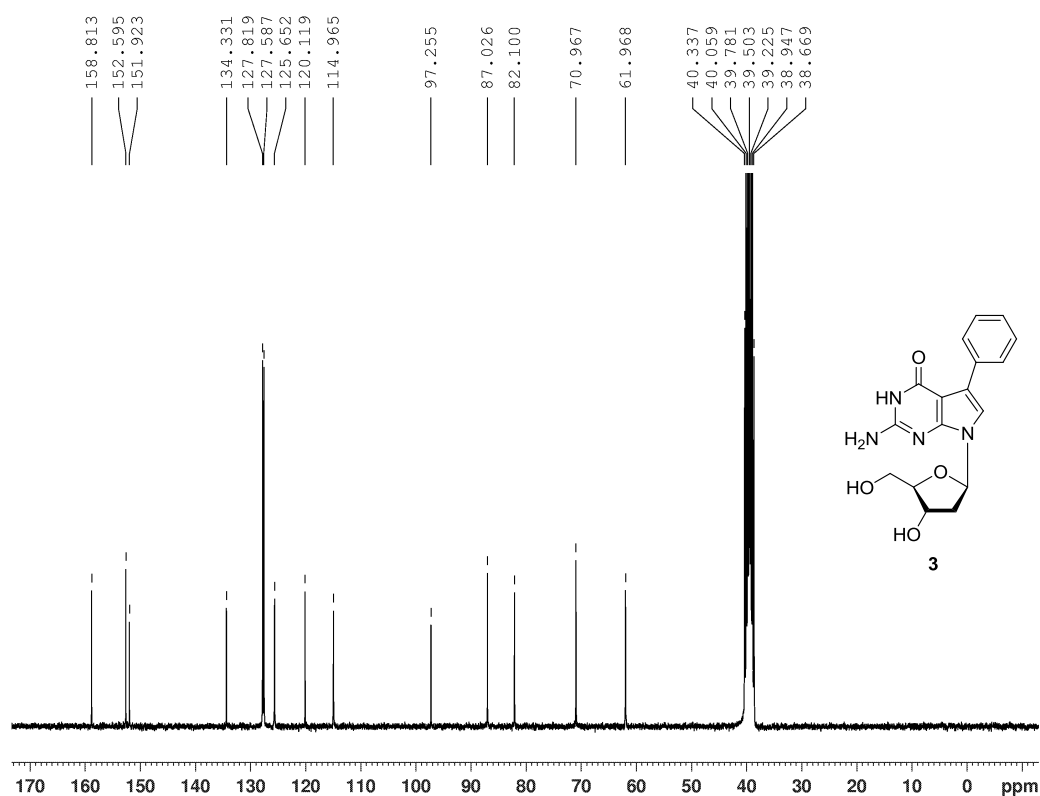

**Figure 55.** <sup>13</sup>C NMR spectrum of compound **3**.

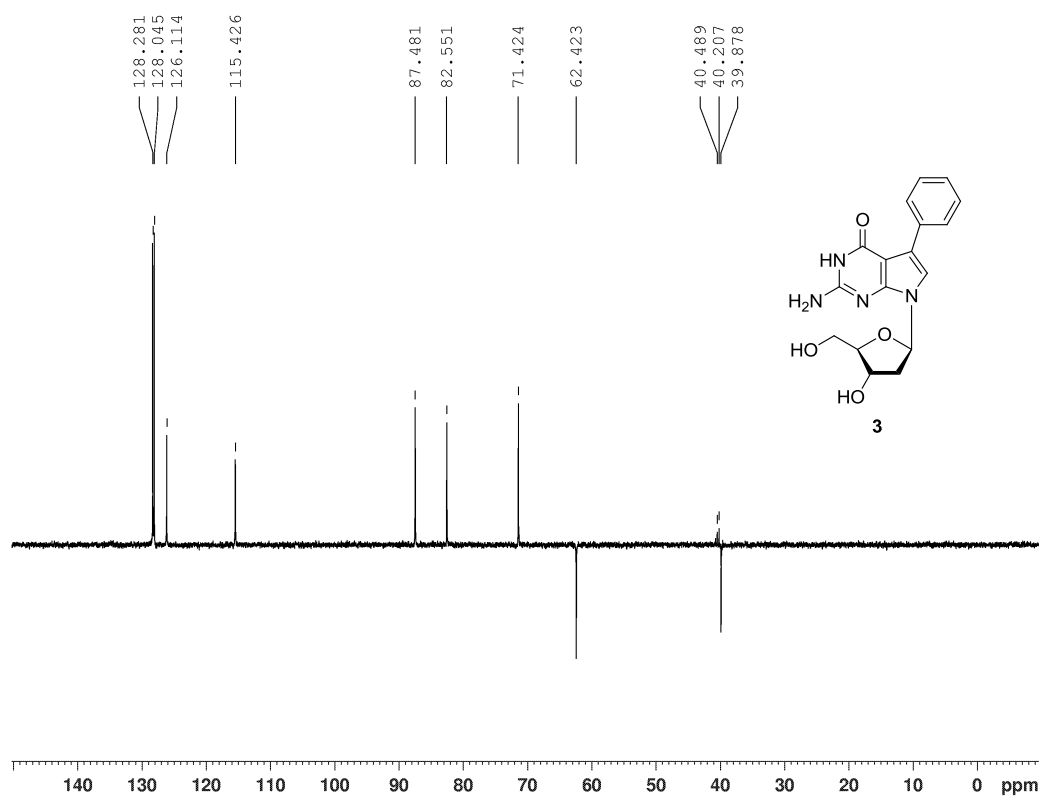

**Figure 56.** DEPT-135 NMR spectrum of compound **3**.



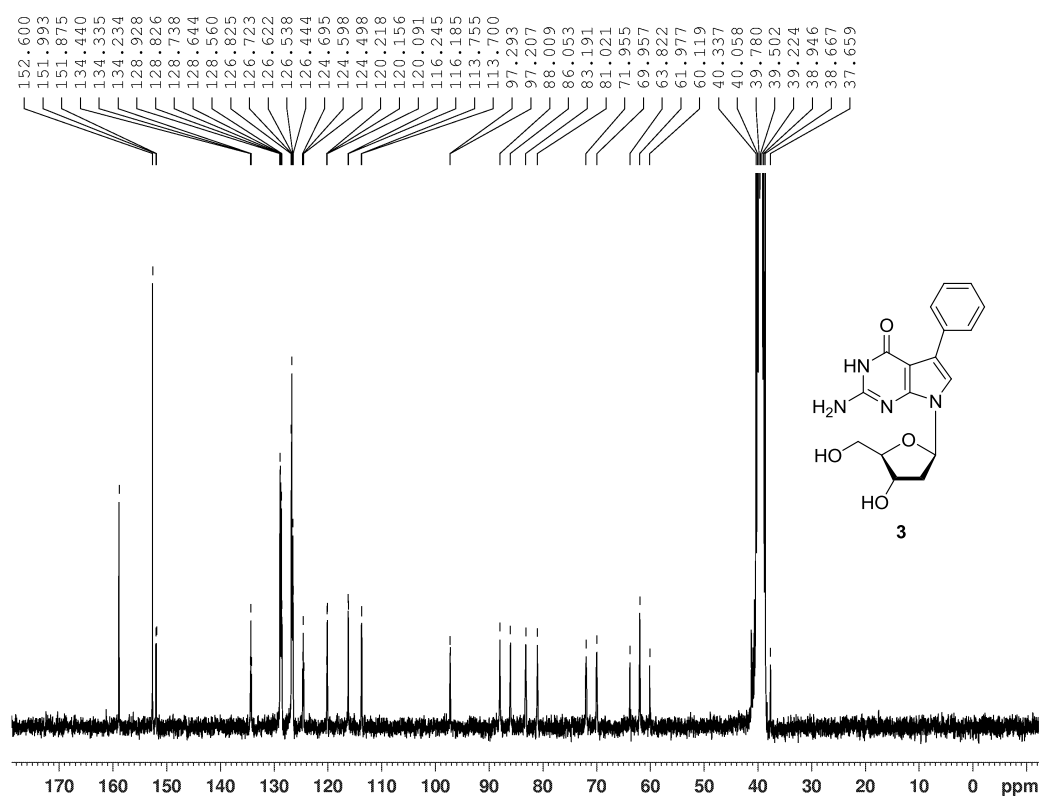

**Figure 57.**  $^1\text{H}$ - $^{13}\text{C}$  gated-decoupled NMR spectrum of compound 3.

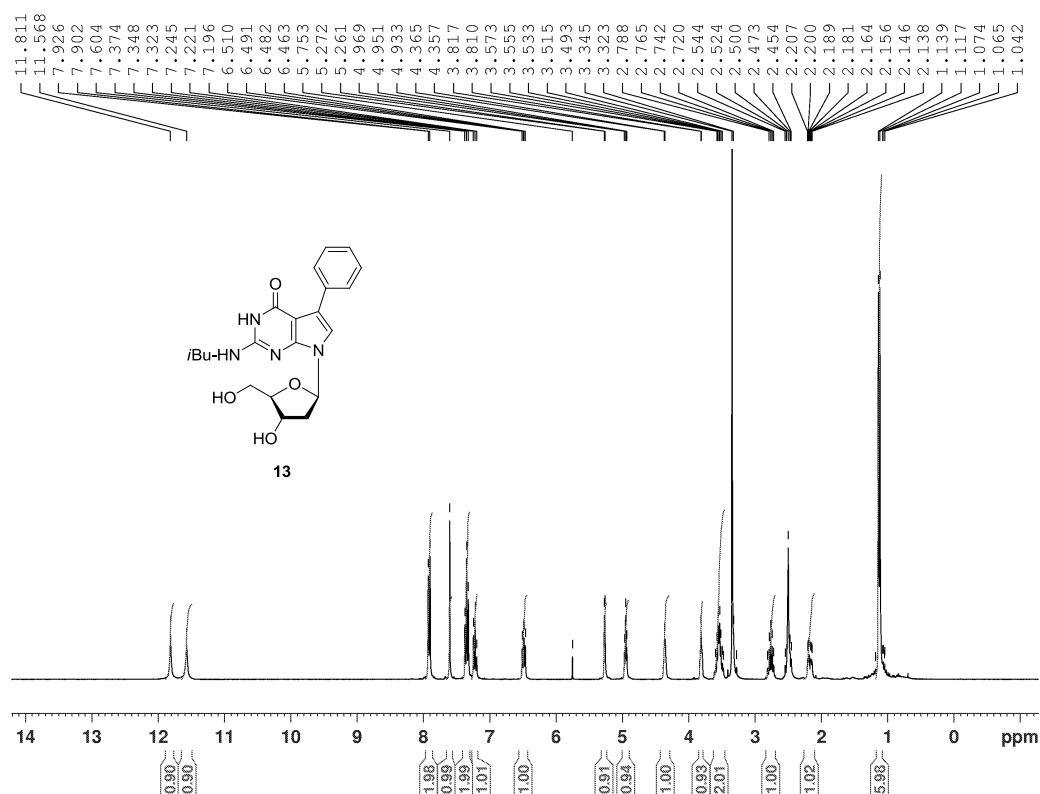

**Figure 58.**  $^1\text{H}$  NMR spectrum of compound 13.

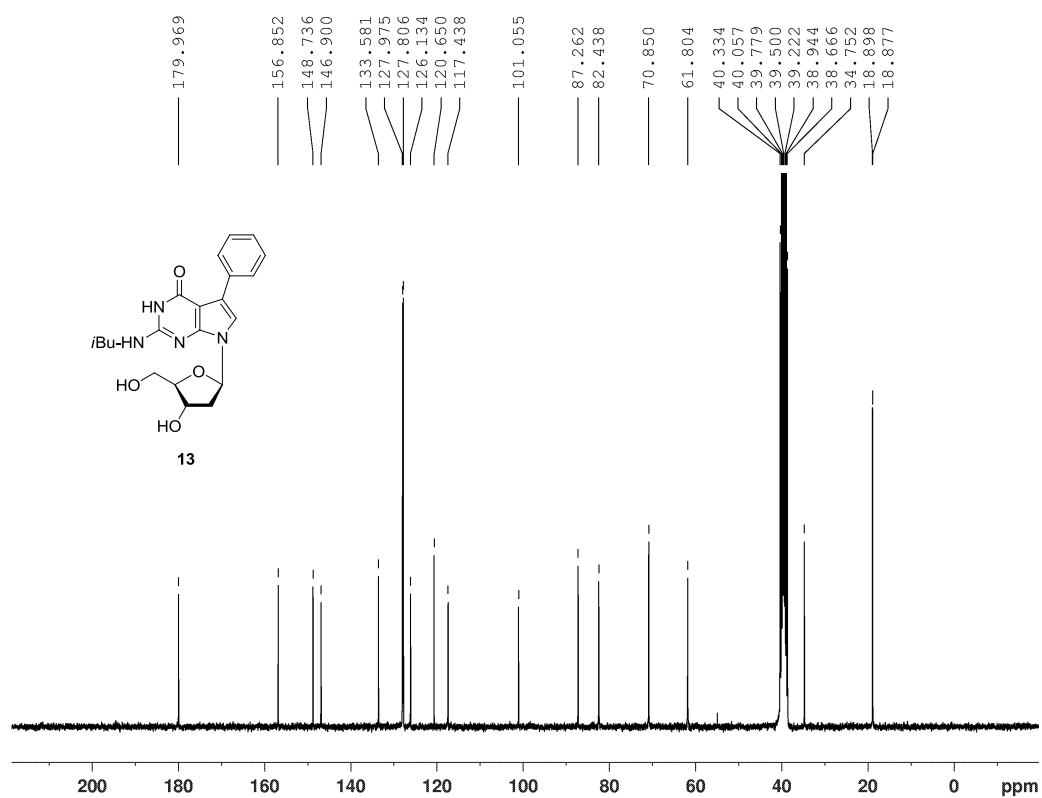

**Figure 59.** <sup>13</sup>C NMR spectrum of compound **13**.

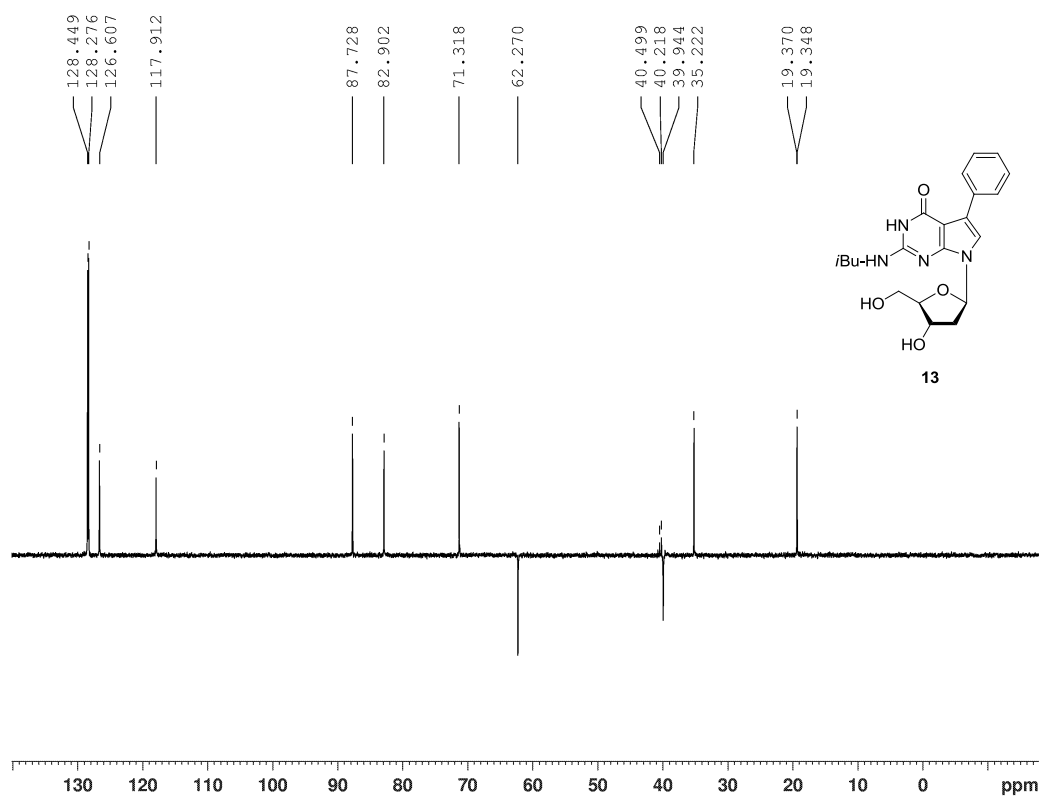

**Figure 60.** DEPT-135 NMR spectrum of compound **13**.

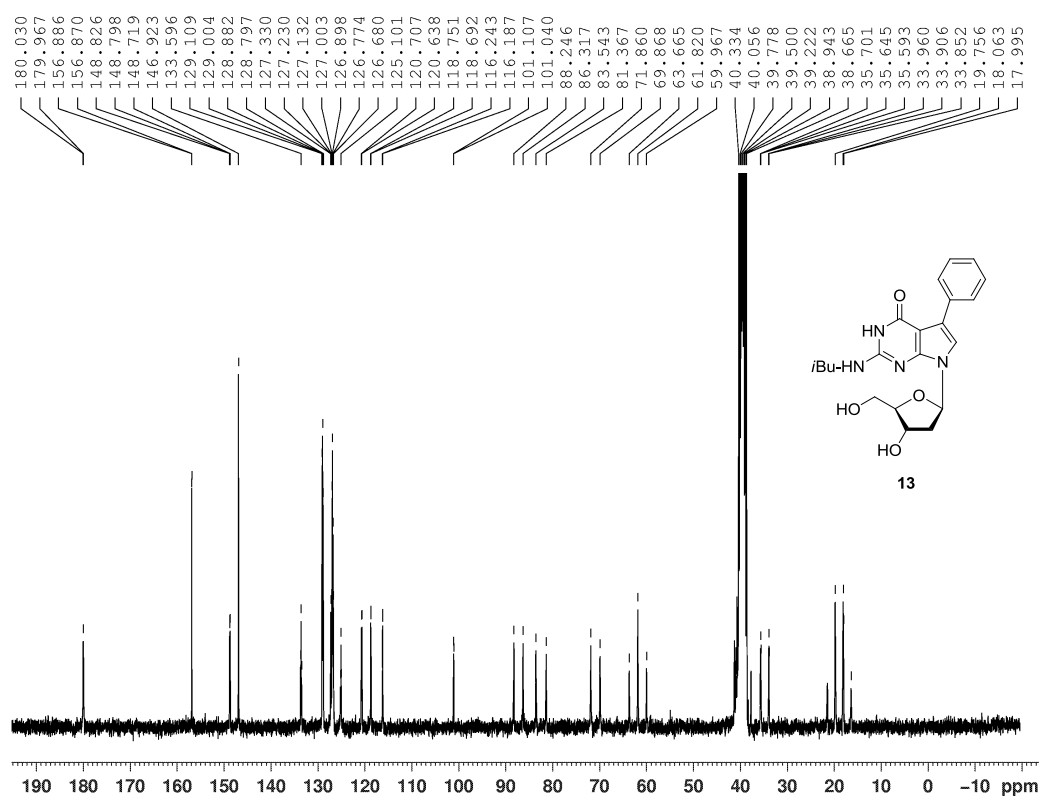

**Figure 61.** <sup>1</sup>H-<sup>13</sup>C gated-decoupled NMR spectrum of compound 13.

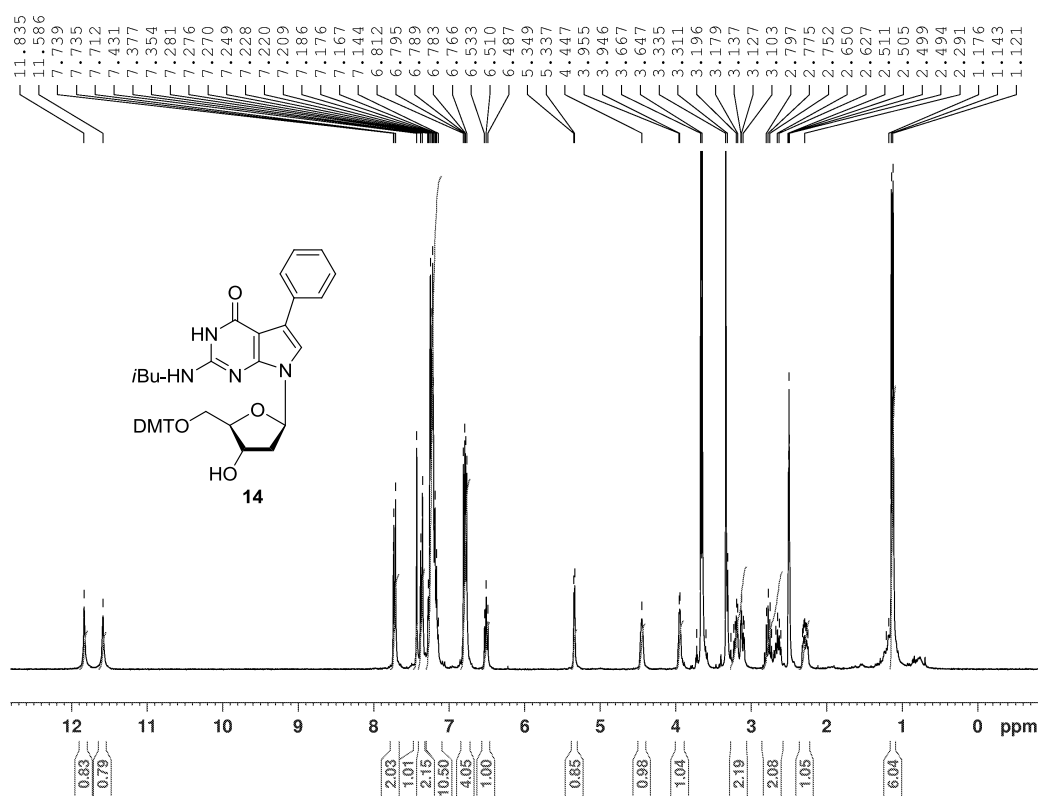

**Figure 62.** <sup>1</sup>H NMR spectrum of compound 14.

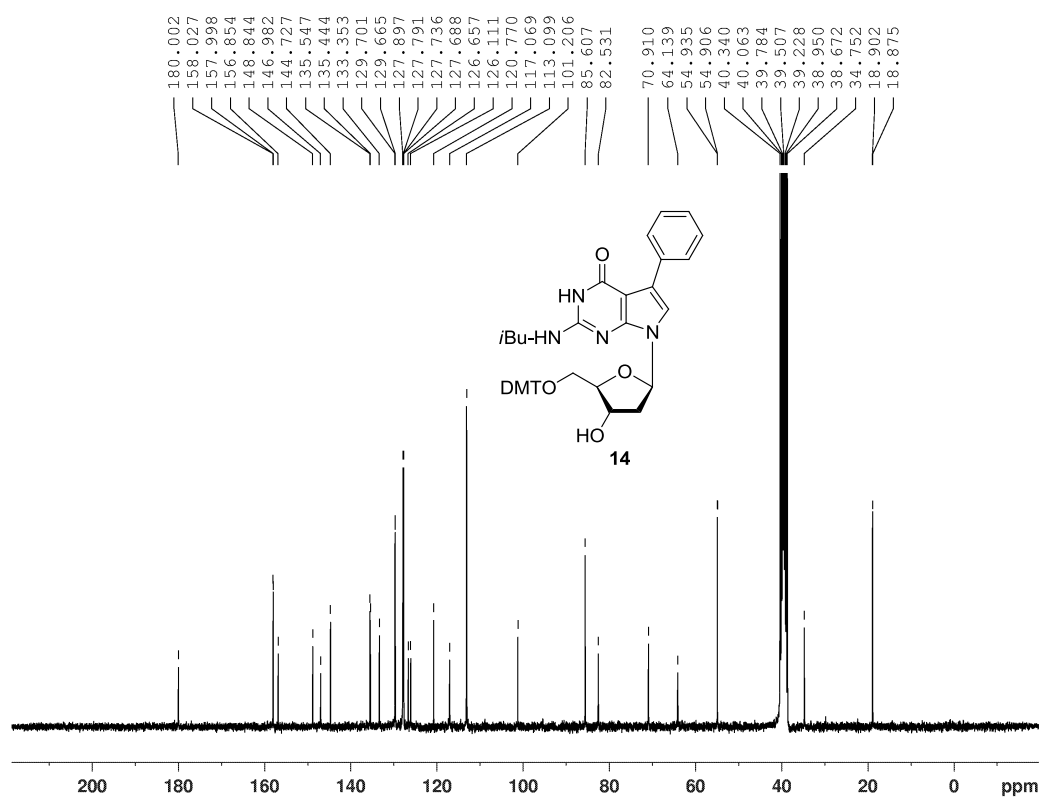

**Figure 63.** <sup>13</sup>C NMR spectrum of compound **14**.

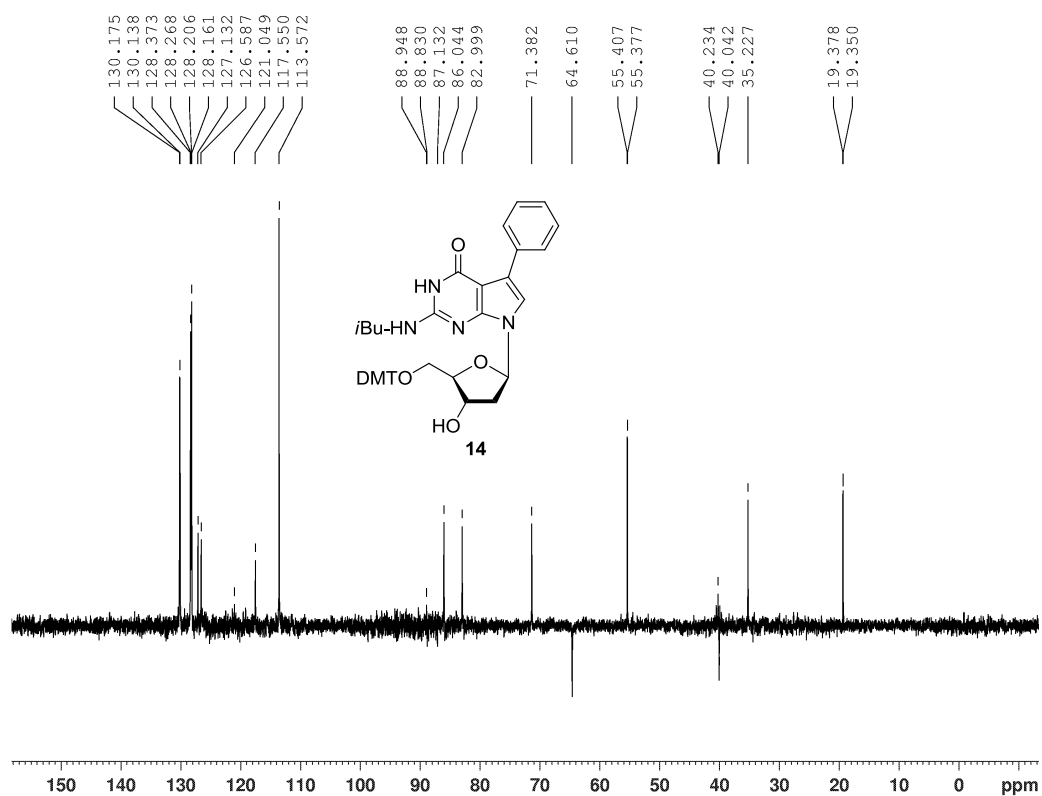

**Figure 64.** DEPT-135 NMR spectrum of compound **14**.

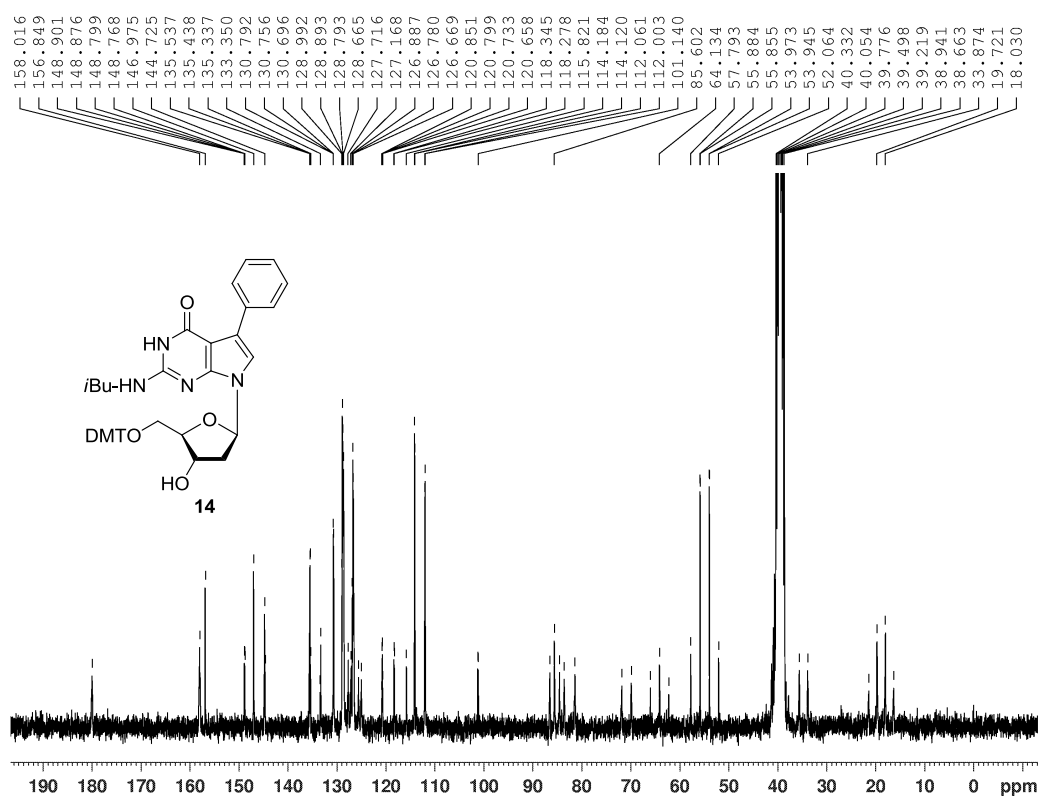

**Figure 65.** <sup>1</sup>H-<sup>13</sup>C gated-decoupled NMR spectrum of compound 14.

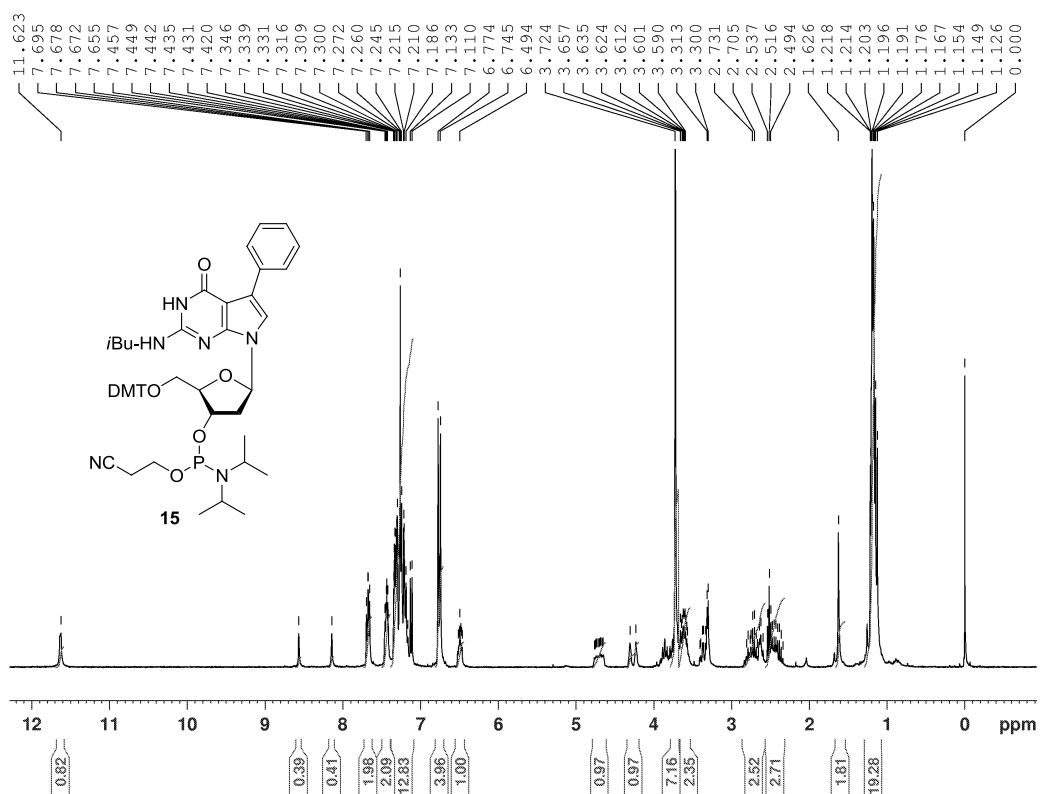

**Figure 66.** <sup>1</sup>H NMR spectrum of compound 15.

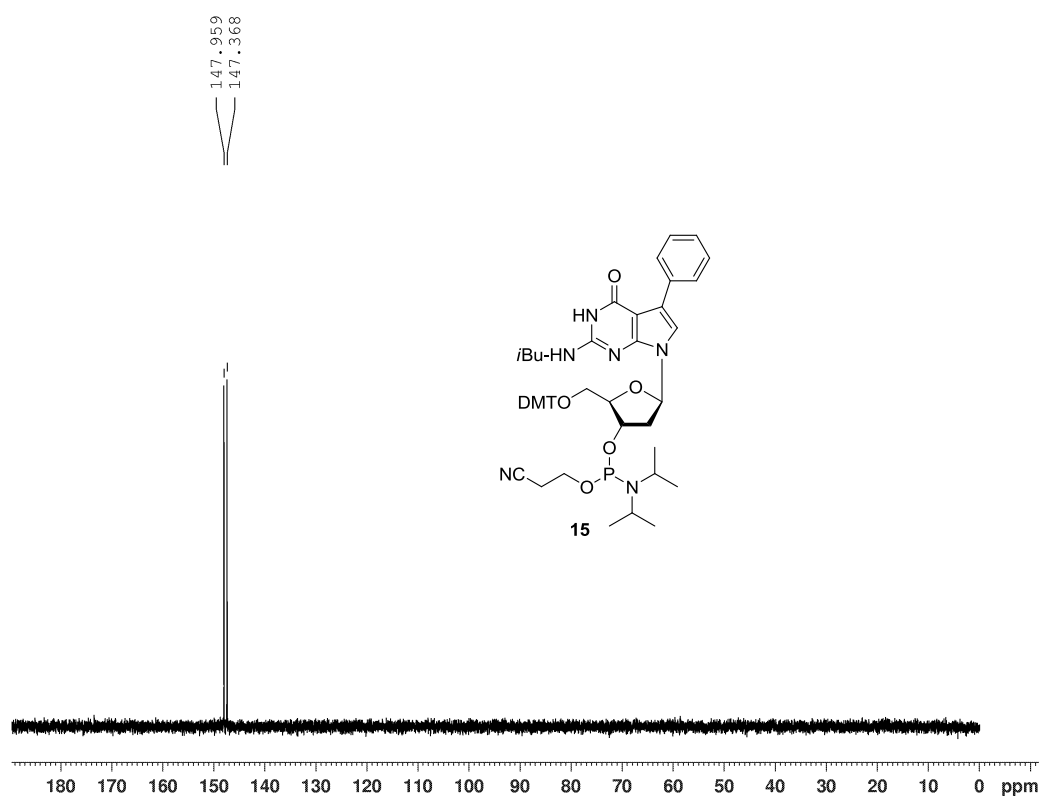

**Figure 67.**  $^{31}\text{P}$  NMR spectrum of compound **15**.

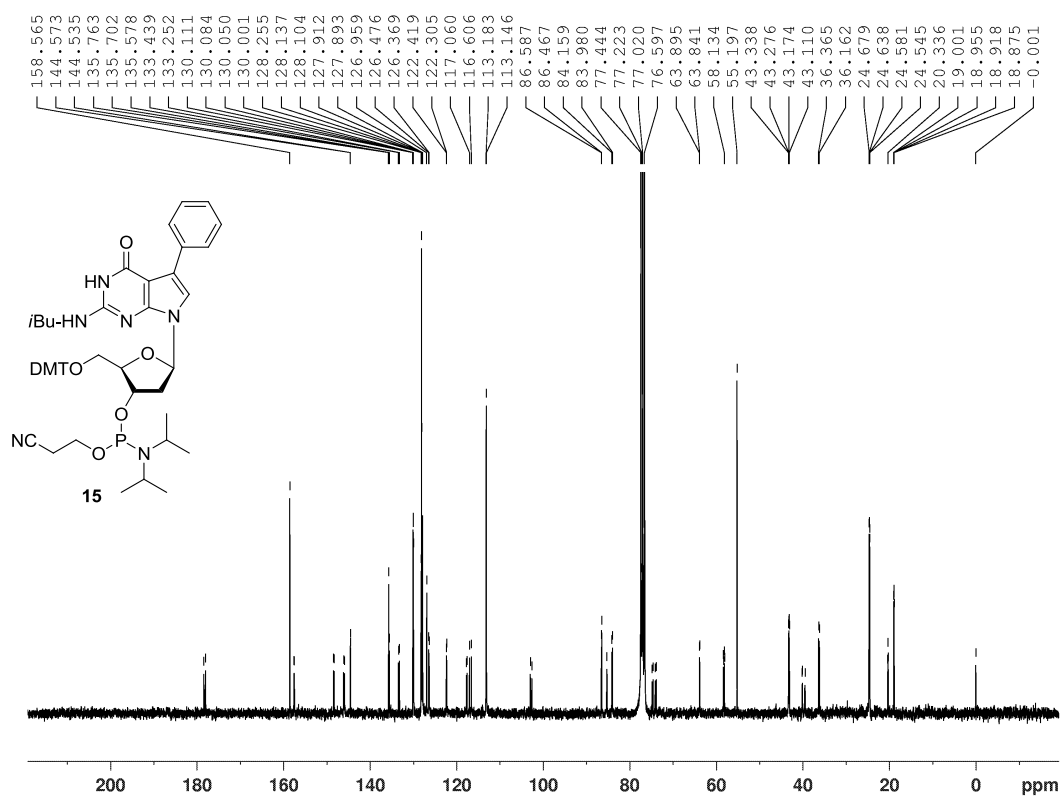

**Figure 68.**  $^{13}\text{C}$  NMR spectrum of compound **15**.

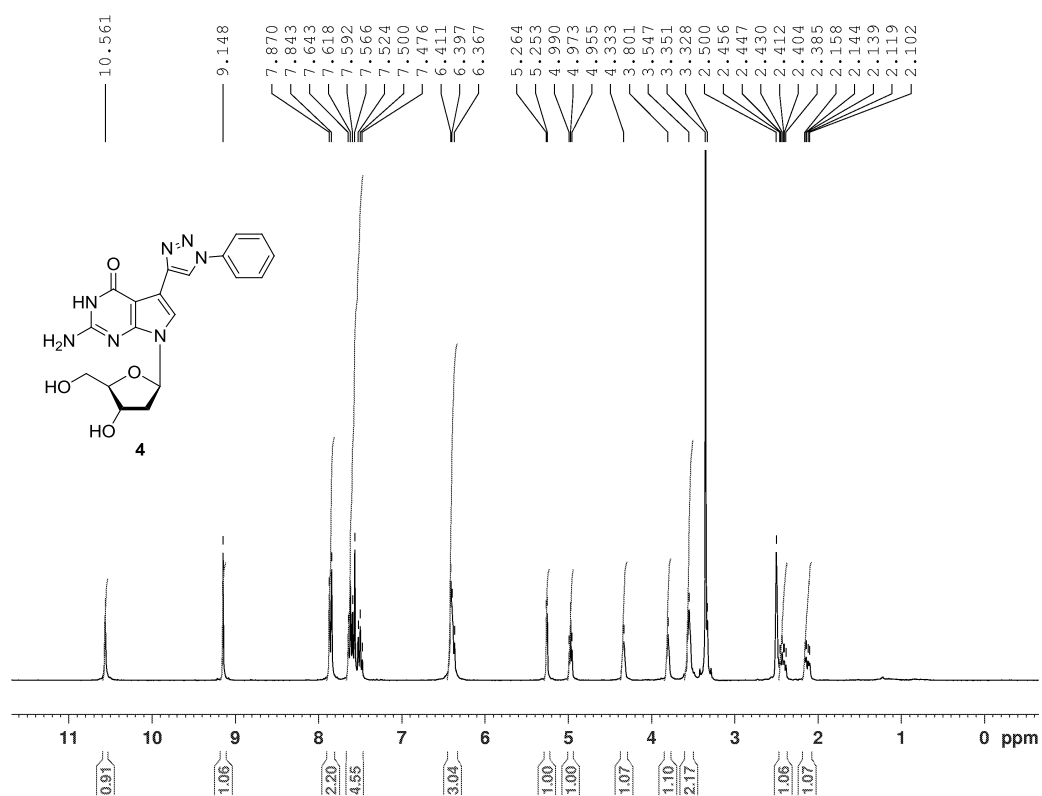

**Figure 69.** <sup>1</sup>H NMR spectrum of compound 4.

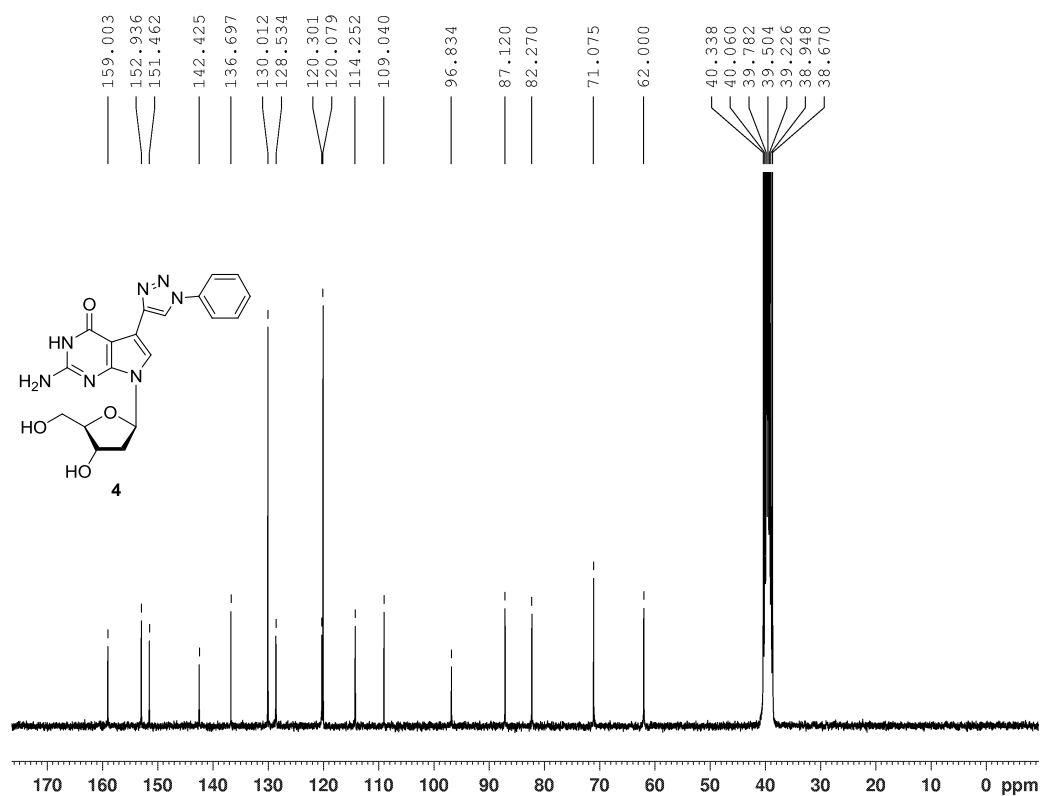

**Figure 70.** <sup>13</sup>C NMR spectrum of compound 4.

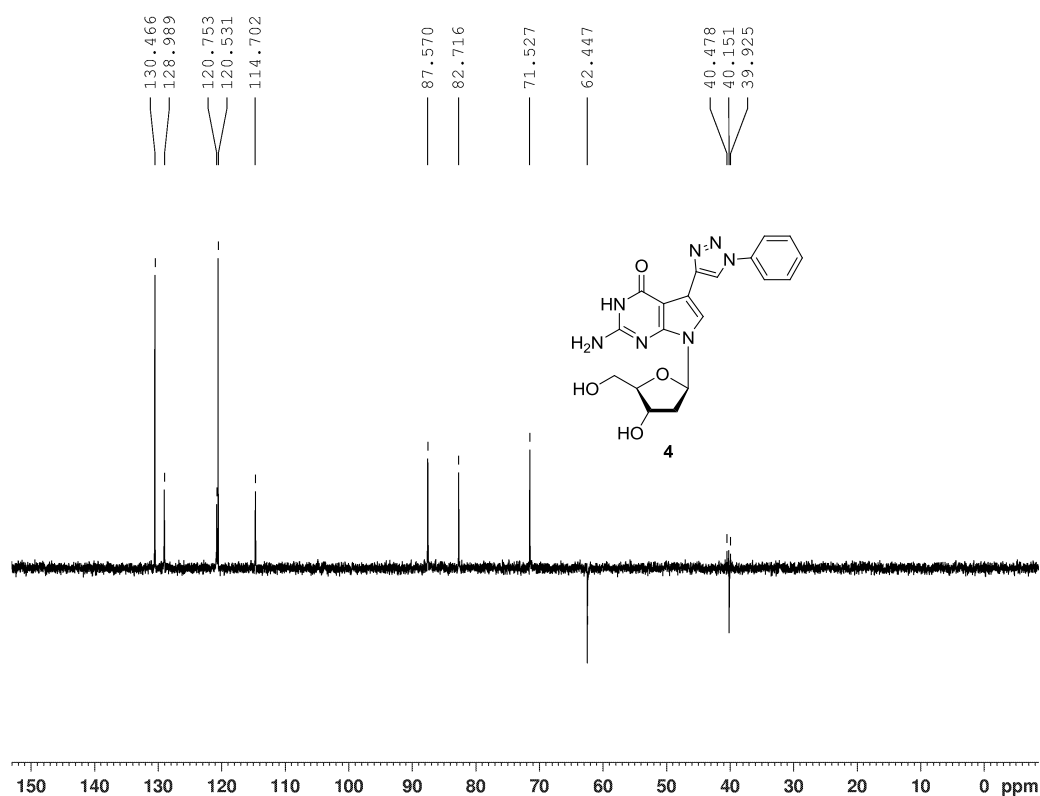

**Figure 71.** DEPT-135 NMR spectrum of compound 4.

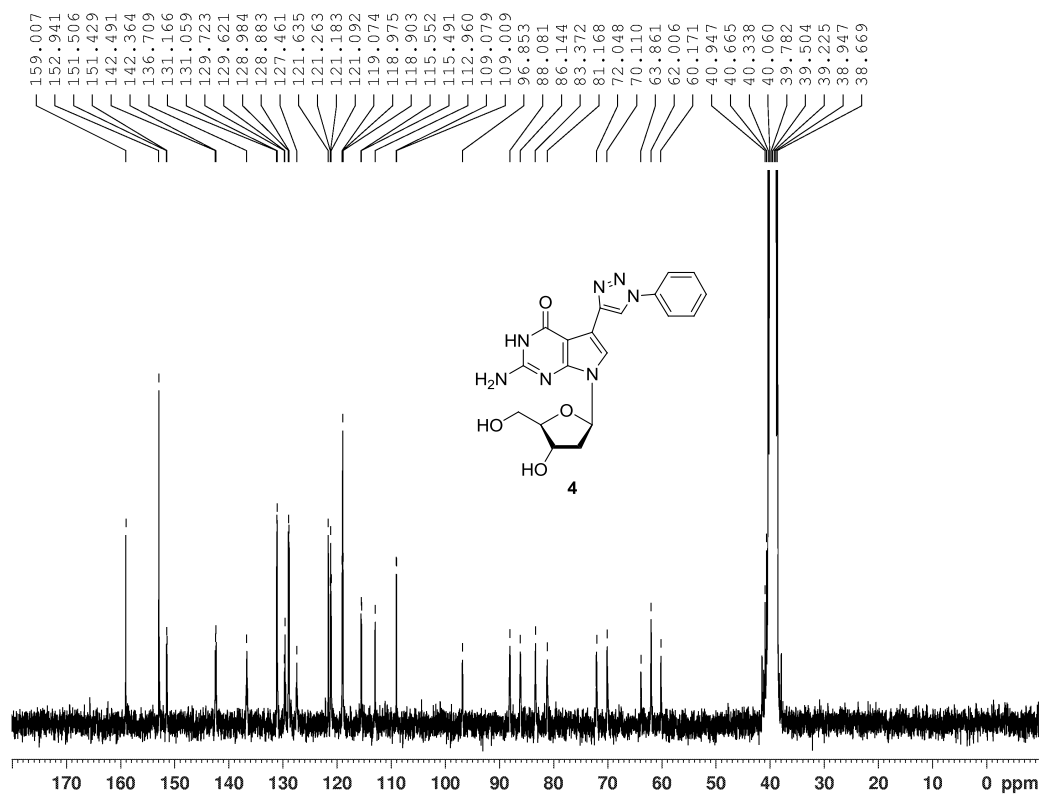

**Figure 72.**  $^1\text{H}$ - $^{13}\text{C}$  gated-decoupled NMR spectrum of compound 4.



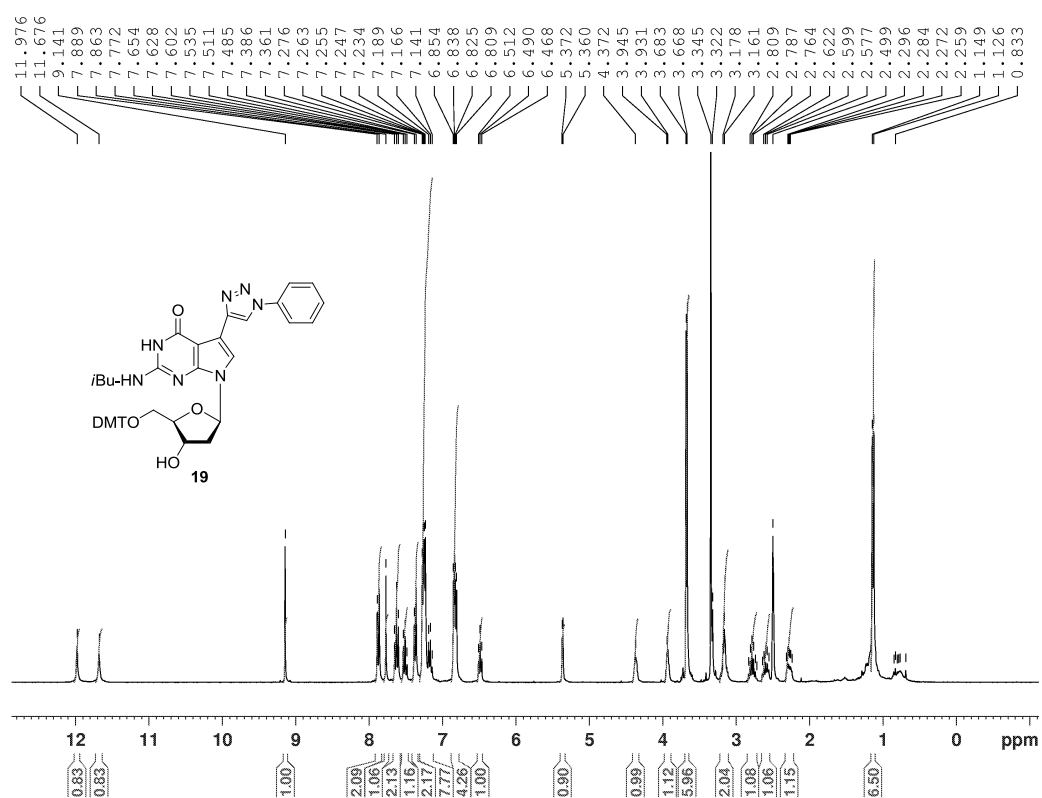

**Figure 73.** <sup>1</sup>H NMR spectrum of compound 19.

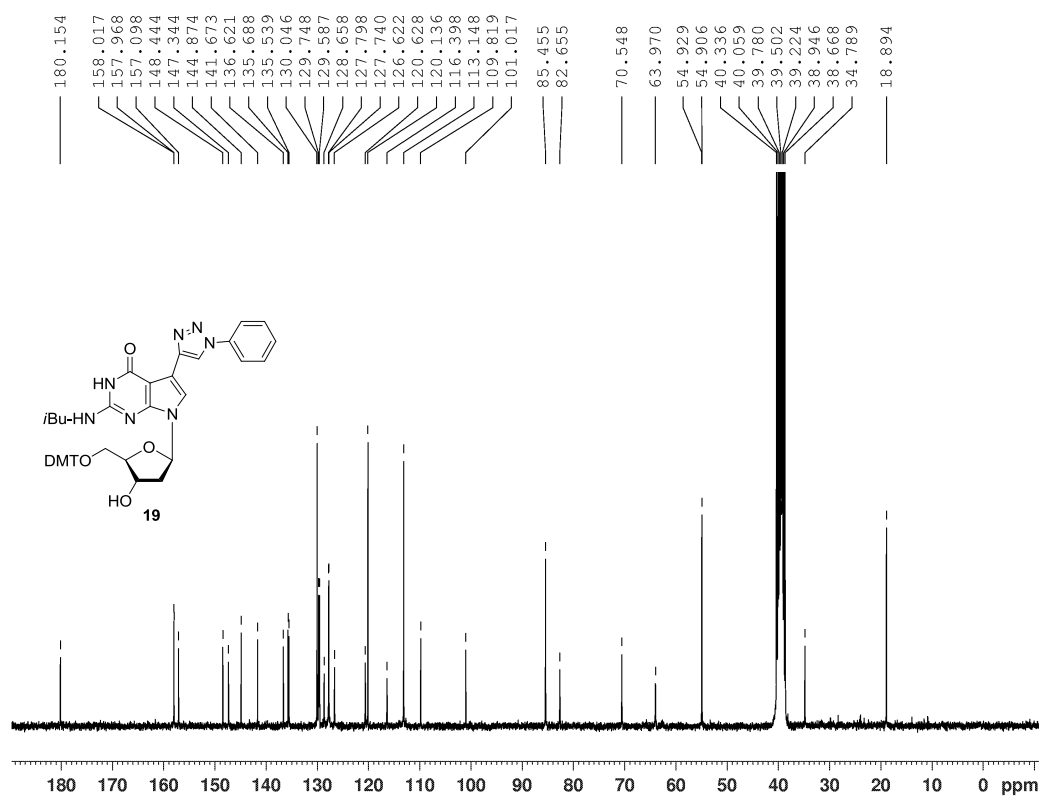

**Figure 74.** <sup>13</sup>C NMR spectrum of compound 19.

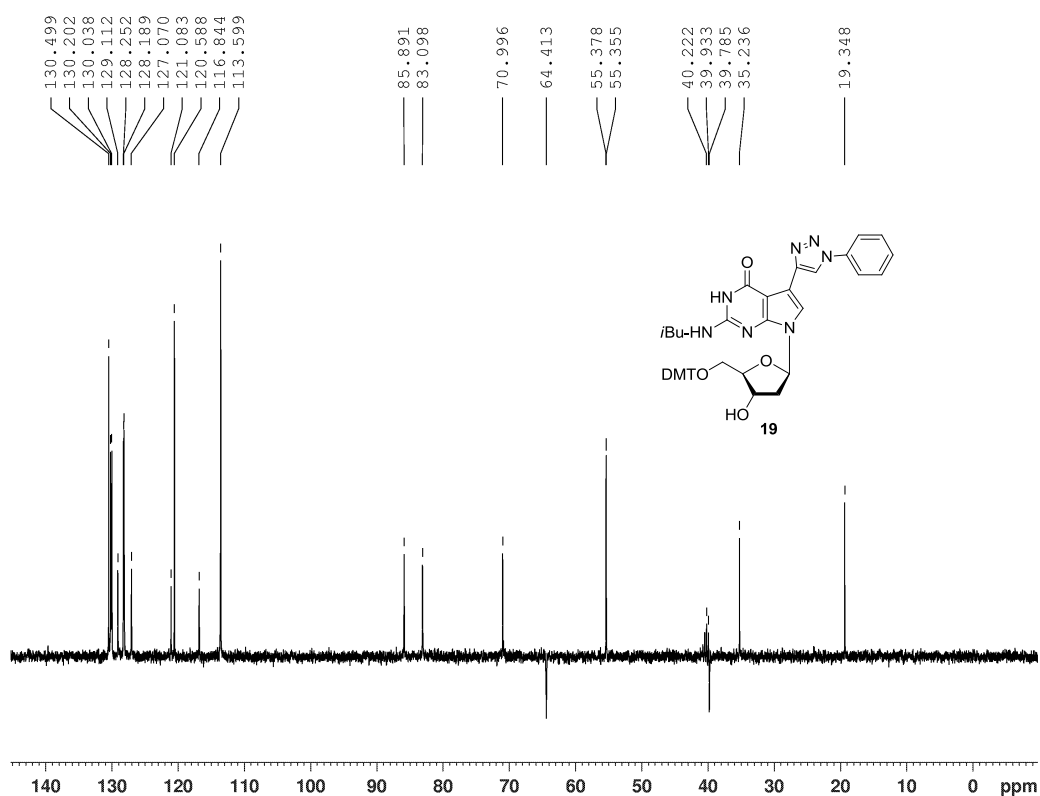

Figure 75. DEPT-135 NMR spectrum of compound 19.

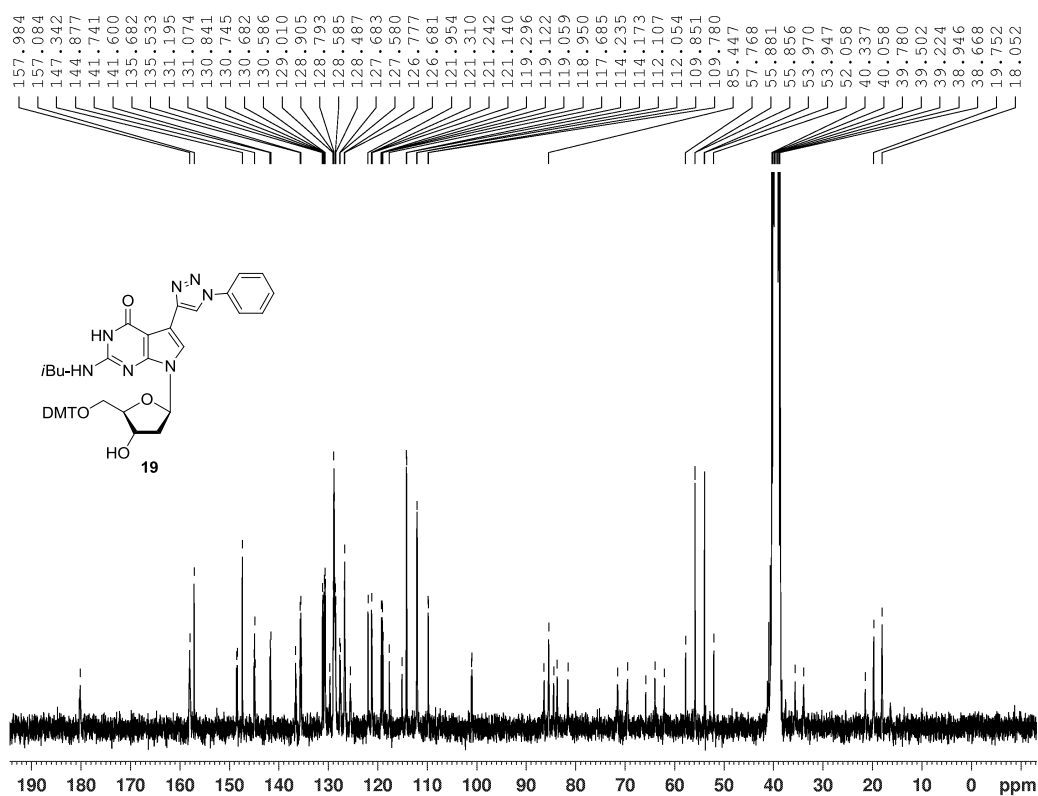

Figure 76.  $^1\text{H}$ - $^{13}\text{C}$  gated-decoupled NMR spectrum of compound 19.

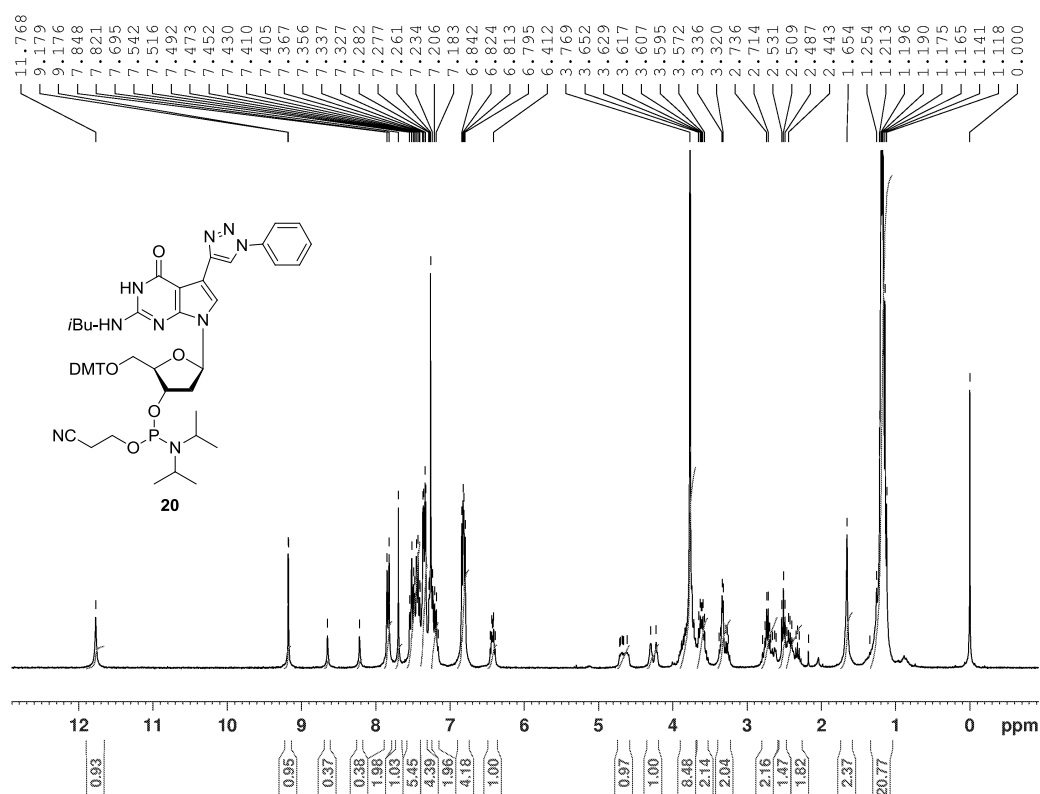

**Figure 77.** <sup>1</sup>H NMR spectrum of compound 20.

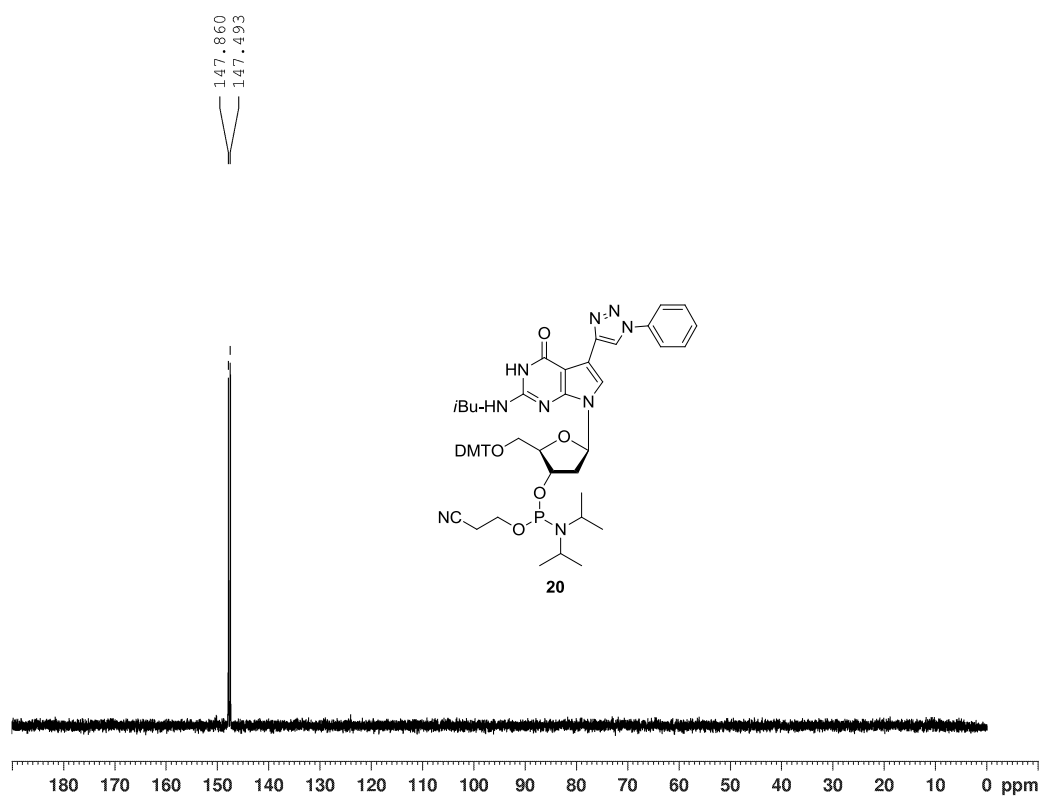

**Figure 78.** <sup>31</sup>P NMR spectrum of compound 20.

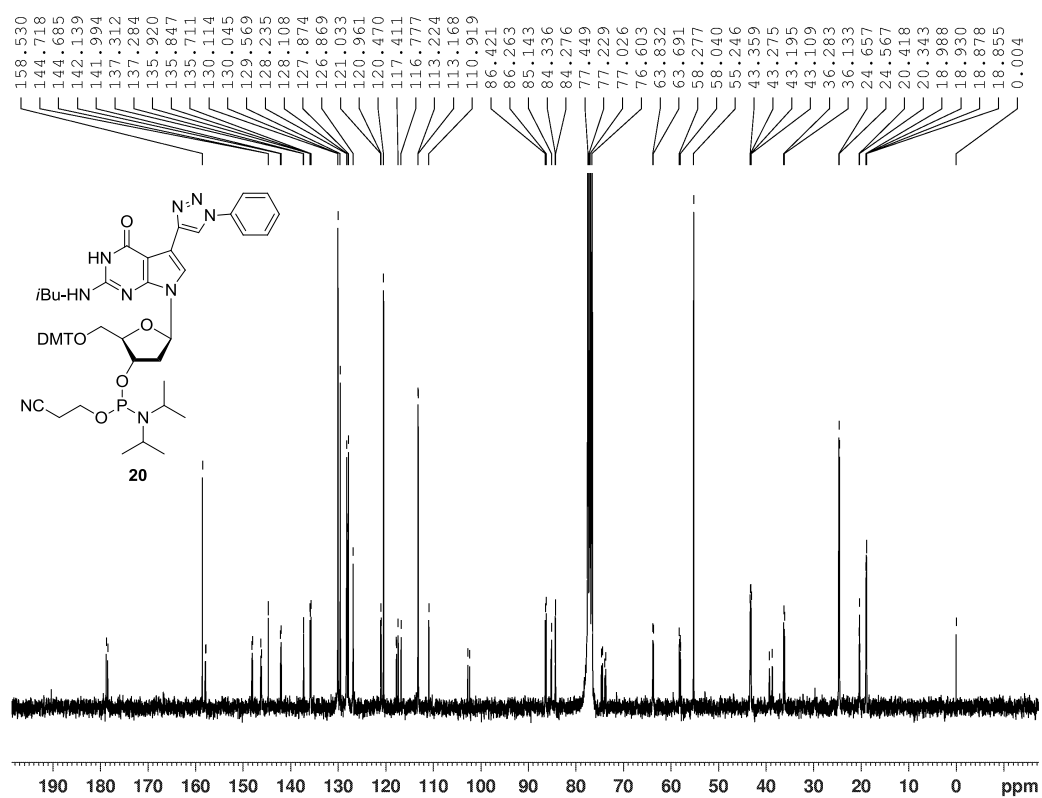

**Figure 79.** <sup>13</sup>C NMR spectrum of compound 20.
